# Supplementary material
Source: PubMed Central journal article supplement (PMC4474488)
Supplement: NIHMS698444-supplement-Supplemental_Tables.pdf [file NIHMS698444-supplement-Supplemental_Tables.pdf]

## Supplementary Online Content

Luu HN, Blot WJ, Xiang Y-B, et al. Prospective evaluation of the association of nut/peanut consumption with total and cause-specific mortality. *JAMA Intern Med*. Published online March 2, 2015. doi:10.1001/jamainternmed.2014.8347.

**eTable 1A.** Sociodemographic Characteristics of Study Participants in the Americans of African Descent in the Southern Community Cohort Study (SCCS), by Quintile of Nut & Peanut Butter

**eTable 1B.** Sociodemographic Characteristics of Study Participants in the Americans of European Descent in the Southern Community Cohort Study (SCCS), by Quintile of Nut & Peanut Butter

**eTable 2.** Sociodemographic Characteristics of Study Participants in the Shanghai Men's Health Study (SMHS) and Shanghai Women's Health Study (SWHS) by Quintile of Peanut

**eTable 3.** Association of Nut/Peanut Intake With Cause-Specific Mortality, by Race/Ethnicity and Gender

**eTable 4A.** Sensitivity Analysis: Association of Nut and Peanut Butter Intake With Total Mortality in the SCCS and Peanut Intake With Total Mortality in the SMHS/SWHS (After Excluding Participants With a Follow-up Time of 2 Years or Less)

**eTable 4B.** Sensitivity Analysis: Association of Nut/Peanut Intake With Cause-Specific Mortality, by Race/Ethnicity (After Excluding Participants With a Follow-up Time of 2 Years or Less)

**eTable 5A.** Sensitivity Analysis: Association of Nut and Peanut Butter Intake With Total Mortality in SCCS and Peanut Intake With Total Mortality in the SMHS/SWHS (After Excluding Participants' Prior Hypertension Status)

**eTable 5B.** Sensitivity Analysis: Association of Nut/Peanut Intake With Cause-Specific Mortality by Race/Ethnicity (After Excluding Participants' Prior Hypertension Status)

**eTable 6A.** Sensitivity Analysis: Association of Nut and Peanut Butter Intake With Total Mortality in SCCS and Peanut Intake With Total Mortality in the SMHS, SWHS (After Excluding Participants' Prior Diabetes Status)

**eTable 6B.** Sensitivity Analysis: Association of Nut/Peanut Intake With Cause-Specific Mortality, by Race/Ethnicity (After Excluding Participants' Prior Diabetes Status)

**eTable 7A.** Sensitivity Analysis: Association of Nut and Peanut Butter Intake With Total Mortality in SCCS and Peanut Intake With Total Mortality in the SMHS/SWHS (After Excluding Participants' Prior Ischemic Heart Disease Status)

**eTable 7B.** Sensitivity Analysis: Association of Nut/Peanut Intake With Cause-Specific Mortality, by Race/Ethnicity (After Excluding Participants' Prior Ischemic Heart Disease Status)

This supplementary material has been provided by the authors to give readers additional information about their work.

**eTable 1A. Sociodemographic Characteristics of Study Participants in the Americans of African Descent in the Southern Community Cohort Study (SCCS), by Quintile of Nut & Peanut Butter**

| Characteristics                                    | Quintile 1 | Quintile 2 | Quintile 3 | Quintile 4 | Quintile 5 | P-value |
|----------------------------------------------------|------------|------------|------------|------------|------------|---------|
|                                                    | (n=10,361) | (n=10,397) | (n=8,661)  | (n=9,648)  | (n=9,380)  |         |
| Age at baseline (Mean±SE)                          | 51.7±0.08  | 51.5±0.008 | 51.7±0.09  | 51.5±0.09  | 51.4±0.09  | 0.01    |
| 40-49                                              | 47.0       | 47.9       | 46.8       | 47.8       | 47.9       | 0.003   |
| 50-59                                              | 34.0       | 34.3       | 35.2       | 34.9       | 35.2       |         |
| 60-69                                              | 14.1       | 13.5       | 13.8       | 13.4       | 13.3       |         |
| 70-79                                              | 4.8        | 4.3        | 4.2        | 3.9        | 3.6        |         |
| Education                                          |            |            |            |            |            |         |
| ≤high school                                       | 37.8       | 32.2       | 27.8       | 28.4       | 27.2       | <0.0001 |
| High/vocational school                             | 39.7       | 40.2       | 38.9       | 39.5       | 37.8       |         |
| Some or completed college                          | 20.7       | 24.8       | 29.4       | 28.0       | 30.3       |         |
| >College                                           | 1.8        | 2.7        | 4.0        | 4.0        | 4.7        |         |
| Income <sup>a</sup>                                |            |            |            |            |            |         |
| Low                                                | 65.3       | 59.9       | 55.5       | 56.9       | 54.7       | <0.0001 |
| Lower-middle                                       | 22.0       | 22.7       | 23.0       | 22.8       | 22.4       |         |
| Middle                                             | 9.5        | 12.7       | 14.5       | 14.2       | 15.1       |         |
| Upper-middle                                       | 2.8        | 3.9        | 5.9        | 5.1        | 6.2        |         |
| High                                               | 0.5        | 0.8        | 1.2        | 1.0        | 1.5        |         |
| Occupation                                         |            |            |            |            |            |         |
| Professional                                       | 20.3       | 21.3       | 25.4       | 23.6       | 24.9       | <0.0001 |
| Clerical                                           | 64.2       | 64.9       | 58.3       | 61.7       | 62.1       |         |
| Manual laborer/Housewife                           | 7.4        | 7.3        | 9.8        | 8.8        | 7.6        |         |
| Never worked/Other                                 | 8.1        | 6.4        | 6.4        | 5.9        | 5.4        |         |
| Smoking                                            |            |            |            |            |            |         |
| Ever smoked regularly                              | 58.4       | 63.0       | 60.3       | 62.8       | 65.3       | <0.0001 |
| Pack-years (Mean±SE)                               | 18.9±0.2   | 18.8±0.2   | 18.6±0.2   | 17.9±0.2   | 18.6±0.2   | 0.02    |
| None                                               | 42.1       | 37.5       | 40.2       | 37.8       | 35.3       | <0.0001 |
| 0-less than 13 pack-years                          | 26.7       | 28.3       | 27.8       | 29.9       | 29.5       |         |
| 13-less than 22 pack-years                         | 13.0       | 14.5       | 14.1       | 14.3       | 15.5       |         |
| 22-less than 32 pack-years                         | 7.7        | 8.7        | 7.8        | 8.6        | 9.0        |         |
| ≥32 pack-years                                     | 10.5       | 11.0       | 10.1       | 9.5        | 10.7       |         |
| Alcohol consumption                                |            |            |            |            |            |         |
| Number of drinks/day (Mean±SE)                     | 1.0±0.03   | 1.4±0.03   | 1.1±0.04   | 1.2±0.03   | 1.4±0.03   | <0.0001 |
| Heavy (>3 drinks/day)                              | 9.2        | 12.9       | 10.4       | 11.3       | 13.7       | <0.0001 |
| Moderate (≤3 drinks/day)                           | 38.5       | 42.1       | 44.1       | 43.3       | 43.8       |         |
| None                                               | 52.3       | 45.0       | 45.4       | 45.3       | 42.5       |         |
| Body mass index (BMI-kg/m <sup>2</sup> ) (Mean±SE) | 31.6±0.07  | 30.6±0.07  | 31.0±0.08  | 30.4±0.08  | 29.6±0.08  | <0.0001 |
| Underweight                                        | 1.2        | 1.0        | 1.1        | 1.1        | 1.1        | <0.0001 |

|                                                    |                      |                       |                       |                         |                          |         |
|----------------------------------------------------|----------------------|-----------------------|-----------------------|-------------------------|--------------------------|---------|
| (<18.5)                                            |                      |                       |                       |                         |                          |         |
| Normal (18.5-24.9)                                 | 18.8                 | 23.8                  | 21.0                  | 24.2                    | 26.0                     |         |
| Overweight (25-29.9)                               | 27.3                 | 29.1                  | 28.7                  | 29.4                    | 32.5                     |         |
| Obese (30-39.9)                                    | 38.3                 | 35.1                  | 36.5                  | 34.2                    | 31.9                     |         |
| Morbidly obese (≥40)                               | 14.4                 | 11.0                  | 12.7                  | 11.1                    | 8.4                      |         |
| Use of vitamin supplements                         | 37.6                 | 40.0                  | 43.3                  | 44.8                    | 48.9                     | <0.0001 |
| Physical activity, MET-hours (Mean±SE)             | 0.8±0.01             | 0.9±0.01              | 0.9±0.01              | 1.0±0.01                | 1.1±0.01                 | <0.0001 |
| Charles comorbidity index <sup>b</sup> (Mean±SE)   | 2.0±0.01             | 1.8±0.01              | 1.9±0.01              | 1.8±0.01                | 1.8±0.02                 | <0.0001 |
| Other chronic diseases                             | 76.0                 | 71.4                  | 74.3                  | 72.4                    | 72.1                     | <0.0001 |
| Hypertension <sup>c  </sup>                        | 63.3                 | 59.2                  | 58.0                  | 56.3                    | 53.2                     | <0.0001 |
| Diabetes <sup>  </sup>                             | 24.5                 | 22.5                  | 23.8                  | 22.1                    | 19.8                     | <0.0001 |
| Heart attack/coronary bypass surgery <sup>  </sup> | 6.5                  | 5.9                   | 5.4                   | 5.4                     | 5.5                      | 0.002   |
| High cholesterol <sup>c  </sup>                    | 32.5                 | 29.7                  | 31.3                  | 29.1                    | 28.7                     | <0.0001 |
| Stroke <sup>  </sup>                               | 7.0                  | 6.4                   | 5.7                   | 5.5                     | 6.0                      | <0.0001 |
| Anti-hypertension medication                       | 25.4                 | 24.5                  | 24.4                  | 23.5                    | 22.3                     | <0.0001 |
| Anti-diabetes medication                           | 21.2                 | 19.6                  | 20.4                  | 19.2                    | 16.7                     | <0.0001 |
| Total energy intake (Kcal/day) (Mean±SE)           | 2,116.9±12.0         | 2,185.5±12.0          | 2,301.8±13.2          | 2,743.9±125             | 3,444.0±12.6             | <0.0001 |
| Dietary intake (grams/day) (Mean±SE)               |                      |                       |                       |                         |                          |         |
| Red meat                                           | 52.2±0.8             | 54.7±0.8              | 58.2±0.8              | 68.4±0.8                | 79.6±0.8                 | <0.0001 |
| Chicken                                            | 62.9±0.6             | 61.2±0.6              | 65.3±0.7              | 72.2±0.7                | 83.6±0.7                 | <0.0001 |
| Seafood                                            | 43.6±0.6             | 42.6±0.6              | 46.9±0.7              | 54.9±0.6                | 67.1±0.6                 | <0.0001 |
| Vegetables                                         | 158.6±1.5            | 152.3±1.5             | 168.0±1.6             | 183.6±1.5               | 214.9±1.5                | <0.0001 |
| Fruits                                             | 431.6±4.2            | 431.6±4.2             | 448.2±4.6             | 505.9±4.4               | 575.7±4.4                | <0.0001 |
| Family history of cancer                           | 42.8                 | 42.8                  | 43.4                  | 43.7                    | 43.8                     | 0.41    |
| Family history of heart diseases/diabetes          | 65.0                 | 62.7                  | 64.9                  | 63.8                    | 63.5                     | 0.004   |
| Peanuts (Mean±SE) (Range)                          | 0.44±0.09 (0.0-0.87) | 1.86±0.09 (0.95-3.08) | 5.25±0.10 (3.12-7.21) | 11.85±0.10 (7.30-18.34) | 38.43±0.10 (18.71-173.2) | <0.0001 |
| Metabolic conditions <sup>d</sup>                  | 82.3                 | 77.9                  | 78.3                  | 76.1                    | 73.7                     | <0.0001 |

Abbreviations: MET: metabolic equivalent; SE: standard error

Nut intake quintile cut-points (grams/day):

SCCS data:

Total nuts & peanut butter: Q1 (<0.95); Q2 (0.95-less than 3.08); Q3 (3.08-less than 7.30); Q4 (7.30-less than 18.45); Q5 (≥18.45)

Nut only: Q1 (<0.36); Q2 (0.36-less than 0.66); Q3 (0.66-less than 4.14); Q4 (4.14-less than 8.63); Q5 (≥8.63)

Peanut butter only: Q1 (<0.19); Q2 (0.19-less than 0.59); Q3 (0.59-less than 2.18); Q4 (2.18-less than 6.32); Q5 (≥6.32)

<sup>a</sup>Income:

Low (<\$15,000/year per household); lower-middle (\$15,000-\$24,999/year per household); middle (\$25,000-\$49,999/year per household); upper-middle (\$50,000-\$99,999/year per household), high (≥\$100,000/year per household)

<sup>b</sup>Charles comorbidity index: calculated based on number of existing chronic diseases.

<sup>c</sup>Self-reported.

<sup>d</sup>Metabolic condition: a person has one or more of the following conditions: history of hypertension, diabetes, history of heart disease, BMI $\geq$ 30, or hypercholesterolemia.

<sup>f</sup>Prevalence of disease conditions

**eTable 1B. Sociodemographic Characteristics of Study Participants in the Americans of European Descent in the Southern Community Cohort Study (SCCS), by Quintile of Nut & Peanut Butter**

| Characteristics                                    | Quintile 1 | Quintile 2 | Quintile 3 | Quintile 4 | Quintile 5 | P-value |
|----------------------------------------------------|------------|------------|------------|------------|------------|---------|
|                                                    | (n=3,812)  | (n=4,504)  | (n=4,951)  | (n=5,194)  | (n=4,956)  |         |
| Age at baseline (Mean±SE)                          | 53.7±0.15  | 53.5±0.13  | 53.7±0.13  | 54.1±0.13  | 55.3±0.13  | <0.0001 |
| 40-49                                              | 38.6       | 38.4       | 38.7       | 36.4       | 31.7       | <0.0001 |
| 50-59                                              | 34.9       | 35.9       | 35.4       | 35.7       | 35.7       |         |
| 60-69                                              | 20.4       | 20.3       | 19.8       | 21.8       | 25.0       |         |
| ≥70                                                | 6.0        | 5.3        | 6.0        | 6.2        | 7.6        |         |
| Education                                          |            |            |            |            |            |         |
| ≤high school                                       | 36.9       | 27.1       | 20.0       | 18.5       | 15.2       | <0.0001 |
| High/vocational school                             | 36.9       | 40.2       | 38.6       | 37.0       | 32.7       |         |
| Some or completed college                          | 22.5       | 28.2       | 32.4       | 34.0       | 37.0       |         |
| >College                                           | 3.6        | 4.4        | 8.9        | 10.5       | 15.1       |         |
| Income <sup>a</sup>                                |            |            |            |            |            |         |
| Low                                                | 60.4       | 51.1       | 43.0       | 41.2       | 34.8       | <0.0001 |
| Lower-middle                                       | 18.9       | 20.6       | 19.1       | 18.4       | 16.2       |         |
| Middle                                             | 12.3       | 15.8       | 18.2       | 18.3       | 19.3       |         |
| Upper-middle                                       | 6.2        | 9.6        | 14.2       | 15.5       | 19.5       |         |
| High                                               | 2.3        | 2.9        | 5.4        | 6.6        | 10.2       |         |
| Occupation                                         |            |            |            |            |            |         |
| Professional                                       | 21.5       | 25.8       | 32.2       | 34.5       | 39.5       | <0.0001 |
| Clerical                                           | 62.2       | 54.8       | 51.7       | 50.8       | 47.4       |         |
| Manual laborer/Housewife                           | 10.2       | 14.0       | 11.4       | 10.2       | 8.5        |         |
| Never worked/Other                                 | 6.1        | 5.4        | 4.7        | 4.5        | 4.5        |         |
| Smoking                                            |            |            |            |            |            |         |
| Ever smoked regularly                              | 69.1       | 66.0       | 66.1       | 65.0       | 65.8       | 0.0009  |
| Pack-years (Mean±SE)                               | 35.2±0.5   | 33.2±0.5   | 31.2±0.5   | 30.4±0.5   | 31.6±0.5   | <0.0001 |
| None                                               | 31.3       | 34.4       | 34.5       | 35.7       | 36.3       | <0.0001 |
| 0-less than 13 pack-years                          | 14.4       | 15.5       | 16.3       | 17.4       | 17.2       |         |
| 13-less than 22 pack-years                         | 10.7       | 10.0       | 11.0       | 10.8       | 9.9        |         |
| 22-less than 32 pack-years                         | 12.3       | 10.3       | 11.9       | 10.6       | 10.3       |         |
| ≥32 pack-years                                     | 31.2       | 29.7       | 26.4       | 25.5       | 26.2       |         |
| Alcohol consumption                                |            |            |            |            |            |         |
| Number of drinks/day (Mean±SE)                     | 0.9±0.04   | 0.6±0.04   | 0.8±0.04   | 0.8±0.04   | 1.0±0.04   | <0.0001 |
| Heavy (>3 drinks/day)                              | 7.4        | 5.1        | 6.9        | 6.9        | 8.6        | <0.0001 |
| Moderate (≤3 drinks/day)                           | 33.5       | 39.1       | 45.1       | 46.8       | 48.4       |         |
| None                                               | 59.1       | 55.7       | 48.0       | 46.3       | 42.9       |         |
| Body mass index (BMI-kg/m <sup>2</sup> ) (Mean±SE) | 30.5±0.12  | 30.7±0.11  | 29.9±0.11  | 29.7±0.10  | 28.9±0.10  | <0.0001 |
| Underweight (<18.5)                                | 1.5        | 1.5        | 1.1        | 1.5        | 1.4        | <0.0001 |
| Normal (18.5-24.9)                                 | 23.9       | 23.6       | 25.9       | 25.8       | 28.6       |         |
| Overweight (25-29.9)                               | 28.5       | 29.0       | 30.4       | 32.0       | 34.2       |         |
| Obese (30-39.9)                                    | 34.9       | 33.4       | 33.0       | 31.6       | 28.6       |         |
| Morbidly obese (≥40)                               | 11.2       | 12.6       | 9.7        | 9.0        | 7.2        |         |
| Use of vitamin supplements                         | 42.0       | 49.0       | 55.1       | 59.9       | 65.3       | <0.0001 |

|                                                   |                      |                      |                       |                         |                          |         |
|---------------------------------------------------|----------------------|----------------------|-----------------------|-------------------------|--------------------------|---------|
| Physical activity, MET-hours (Mean±SE)            | 0.8±0.01             | 0.9±0.01             | 0.9±0.01              | 0.9±0.01                | 0.9±0.01                 | <0.0001 |
| Charles comorbidity index <sup>b</sup> (Mean±SE)  | 2.3±0.03             | 2.2±0.02             | 2.0±0.02              | 2.0±0.02                | 2.0±0.02                 | <0.0001 |
| Other chronic diseases                            | 86.3                 | 87.3                 | 85.3                  | 84.4                    | 83.1                     | <0.0001 |
| Hypertension <sup>c†</sup>                        | 54.7                 | 51.3                 | 46.1                  | 48.7                    | 45.2                     | <0.0001 |
| Diabetes <sup>†</sup>                             | 21.6                 | 20.3                 | 18.0                  | 19.2                    | 18.0                     | <0.0001 |
| Heart attack/coronary bypass surgery <sup>†</sup> | 12.3                 | 8.7                  | 9.0                   | 9.0                     | 9.0                      | <0.0001 |
| High cholesterol <sup>c†</sup>                    | 43.1                 | 41.9                 | 41.2                  | 41.9                    | 42.4                     | 0.48    |
| Stroke <sup>†</sup>                               | 10.0                 | 7.4                  | 6.2                   | 5.9                     | 5.5                      | <0.0001 |
| Anti-hypertension medication                      | 30.9                 | 28.4                 | 27.7                  | 29.7                    | 28.6                     | <0.0001 |
| Anti-diabetes medication                          | 17.7                 | 16.3                 | 14.1                  | 15.3                    | 13.7                     | <0.0001 |
| Total energy intake (Kcal/day) (Mean±SE)          | 1,899.9±16.7         | 1,823.9±15.4         | 2,057.2±14.7          | 2,341.2±14.3            | 2,775.6±14.7             | <0.0001 |
| Dietary intake (grams/day) (Mean±SE)              |                      |                      |                       |                         |                          |         |
| Red meat                                          | 58.4±1.2             | 56.9±1.1             | 63.0±1.1              | 70.0±1.0                | 74.9±1.1                 | <0.0001 |
| Chicken                                           | 50.0±0.9             | 50.2±0.8             | 53.2±0.8              | 60.1±0.8                | 62.9±0.8                 | <0.0001 |
| Seafood                                           | 25.7±0.6             | 26.1±0.6             | 28.6±0.5              | 33.5±0.5                | 39.6±0.5                 | <0.0001 |
| Vegetables                                        | 141.0±1.9            | 139.4±1.7            | 147.8±1.6             | 164.0±1.6               | 190.6±1.6                | <0.0001 |
| Fruits                                            | 244.1±4.5            | 244.0±4.2            | 259.4±4.0             | 287.4±3.9               | 330.6±4.0                | <0.0001 |
| Family history of cancer                          | 60.4                 | 62.1                 | 61.6                  | 60.5                    | 62.4                     | 0.18    |
| Family history of heart diseases/diabetes         | 71.1                 | 69.8                 | 68.9                  | 68.8                    | 65.7                     | <0.0001 |
| Peanuts (Mean±SE) (Range)                         | 0.42±0.14 (0.0-0.90) | 2.0±0.12 (0.96-3.03) | 5.27±0.12 (3.17-7.29) | 12.86±0.12 (7.43-18.45) | 36.43±0.12 (18.52-164.0) | <0.0001 |
| Metabolic conditions <sup>d</sup>                 | 79.2                 | 77.7                 | 74.2                  | 74.7                    | 72.8                     | <0.0001 |

Abbreviations: MET: metabolic equivalent; SE: standard error

Nut intake quintile cut-points (grams/day):

SCCS data:

Total nuts & peanut butter: Q1 (<0.95); Q2 (0.95-less than 3.08); Q3 (3.08-less than 7.30); Q4 (7.30-less than 18.45); Q5 (≥18.45)

Nut only: Q1 (<0.36); Q2 (0.36-less than 0.66); Q3 (0.66-less than 4.14); Q4 (4.14-less than 8.63); Q5 (≥8.63)

Peanut butter only: Q1 (<0.19); Q2 (0.19-less than 0.59); Q3 (0.59-less than 2.18); Q4 (2.18-less than 6.32); Q5 (≥6.32)

<sup>a</sup>Income:

Low (<\$15,000/year per household); lower-middle (\$15,000-\$24,999/year per household); middle (\$25,000-\$49,999/year per household); upper-middle (\$50,000-\$99,999/year per household), high (≥\$100,000/year per household)

<sup>b</sup>Charles comorbidity index: calculated based on number of existing chronic diseases.

<sup>c</sup>Self-reported.

<sup>d</sup>Metabolic condition: a person has one or more of the following conditions: history of hypertension, diabetes, history of heart disease, BMI≥30, or hypercholesterolemia.

<sup>†</sup>Prevalence of disease conditions

**eTable 2. Sociodemographic Characteristics of Study Participants in the Shanghai Men's Health Study (SMHS) and Shanghai Women's Health Study (SWHS) by Quintile of Peanut**

| Characteristics                  | Quintile 1 | Quintile 2 | Quintile 3 | Quintile 4 | Quintile 5 | P-value |
|----------------------------------|------------|------------|------------|------------|------------|---------|
|                                  | (n=26,236) | (n=21,853) | (n=28,049) | (n=32,438) | (n=25,689) |         |
| Age at baseline (Mean±SE)        | 55.0±0.06  | 51.5±0.06  | 52.7±0.05  | 54.3±0.05  | 55.2±0.06  | <0.0001 |
| 40-49                            | 41.0       | 54.3       | 48.2       | 40.9       | 36.5       | <0.0001 |
| 50-59                            | 24.1       | 24.6       | 27.7       | 29.4       | 30.4       |         |
| 60-69                            | 26.4       | 18.6       | 20.4       | 23.8       | 26.3       |         |
| ≥70                              | 8.5        | 2.4        | 3.7        | 5.9        | 6.9        |         |
| Education <sup>a</sup>           |            |            |            |            |            |         |
| Elementary or less               | 20.3       | 14.3       | 13.7       | 13.7       | 11.6       | <0.0001 |
| Middle school                    | 36.3       | 37.8       | 36.2       | 35.1       | 32.6       |         |
| ≤high school                     | 29.3       | 32.6       | 32.3       | 31.6       | 32.2       |         |
| Some or completed college        | 14.1       | 15.3       | 17.5       | 19.6       | 23.5       |         |
| Income <sup>b</sup>              |            |            |            |            |            |         |
| Low                              | 17.9       | 14.3       | 13.9       | 13.5       | 13.0       | <0.0001 |
| Lower-middle                     | 42.5       | 39.2       | 39.3       | 40.8       | 39.0       |         |
| Upper-middle                     | 28.3       | 30.7       | 31.7       | 31.8       | 33.8       |         |
| High                             | 11.3       | 15.8       | 15.1       | 13.9       | 14.1       |         |
| Occupation                       |            |            |            |            |            |         |
| Professional                     | 23.2       | 26.9       | 27.7       | 28.3       | 31.6       | <0.0001 |
| Clerical                         | 21.3       | 21.4       | 21.6       | 20.9       | 21.3       |         |
| Manual laborer/Housewife         | 55.4       | 51.7       | 50.7       | 50.7       | 47.1       |         |
| Smoking <sup>b</sup>             |            |            |            |            |            |         |
| Ever smoked regularly            | 71.5       | 70.9       | 68.7       | 68.5       | 69.5       | <0.0001 |
| Pack-years (Mean±SE)             | 24.1±0.2   | 21.4±0.2   | 21.3±0.2   | 22.1±0.1   | 22.9±0.1   | <0.0001 |
| None                             | 28.5       | 29.1       | 31.3       | 31.5       | 30.5       | <0.0001 |
| 0-less than 13 pack-years        | 1.2        | 1.5        | 1.4        | 1.6        | 1.4        |         |
| 13-less than 22 pack-years       | 5.8        | 8.3        | 6.9        | 6.4        | 6.1        |         |
| 22-less than 32 pack-years       | 32.3       | 39.7       | 36.7       | 32.4       | 30.9       |         |
| ≥32 pack-years                   | 32.2       | 21.5       | 23.6       | 28.1       | 31.0       |         |
| Alcohol consumption <sup>b</sup> |            |            |            |            |            |         |
| Ever consumed alcohol regularly  | 32.9       | 29.4       | 29.2       | 33.4       | 39.7       | <0.0001 |
| Number of drinks/day (Mean±SE)   | 1.0±0.02   | 0.8±0.01   | 0.7±0.01   | 0.7±0.02   | 0.9±0.02   | <0.0001 |
| Heavy (>3 drinks/day)            | 10.8       | 7.8        | 7.2        | 8.2        | 11.5       | <0.0001 |
| Moderate (≤3 drinks/day)         | 21.6       | 21.3       | 21.7       | 24.8       | 27.9       |         |
| None                             | 67.5       | 70.9       | 71.1       | 66.9       | 60.6       |         |
| Regular tea consumption          | 43.5       | 39.3       | 44.5       | 50.1       | 55.2       | <0.0001 |
| Body mass index                  | 23.4±0.02  | 23.7±0.01  | 23.9±0.02  | 24.0±0.02  | 24.1±0.02  | <0.0001 |

|                                                  |                       |                      |                     |                      |                      |         |
|--------------------------------------------------|-----------------------|----------------------|---------------------|----------------------|----------------------|---------|
| (BMI-kg/m <sup>2</sup> )<br>(Mean±SE)            |                       |                      |                     |                      |                      |         |
| Underweight (<18.5)                              | 5.3                   | 4.0                  | 3.6                 | 3.1                  | 3.0                  | <0.0001 |
| Normal (18.5-24.9)                               | 61.9                  | 64.4                 | 62.3                | 61.2                 | 60.4                 |         |
| Overweight (25-29.9)                             | 28.8                  | 27.5                 | 30.3                | 31.7                 | 32.7                 |         |
| Obese (30-39.9)                                  | 4.0                   | 4.0                  | 3.8                 | 4.0                  | 3.8                  |         |
| Morbidly obese (≥40)                             | 0.03                  | 0.03                 | 0.03                | 0.01                 | 0.03                 |         |
| Use of vitamin supplements                       | 15.9                  | 17.2                 | 17.4                | 17.8                 | 19.2                 | <0.0001 |
| Physical activity, MET-hours (Mean±SE)           | 1.0±0.01              | 0.9±0.01             | 0.7±0.01            | 0.6±0.01             | 0.8±0.01             | <0.0001 |
| Charles comorbidity index <sup>c</sup> (Mean±SE) | 0.6±0.01              | 0.4±0.01             | 0.5±0.01            | 0.5±0.01             | 0.6±0.01             | <0.0001 |
| Other chronic diseases                           | 36.4                  | 31.8                 | 34.2                | 36.5                 | 39.1                 | <0.0001 |
| Hypertension <sup>a  </sup>                      | 28.9                  | 22.8                 | 24.8                | 27.0                 | 27.9                 | <0.0001 |
| Diabetes <sup>  </sup>                           | 5.8                   | 3.3                  | 4.3                 | 5.4                  | 6.8                  | <0.0001 |
| Ischemic heart disease <sup>  </sup>             | 7.3                   | 5.2                  | 5.7                 | 6.2                  | 6.9                  | <0.0001 |
| Stroke <sup>  </sup>                             | 3.7                   | 1.8                  | 1.8                 | 2.1                  | 2.2                  | <0.0001 |
| Anti-hypertension medication                     | 21.2                  | 15.6                 | 17.8                | 19.7                 | 20.6                 | <0.0001 |
| Anti-diabetes medication                         | -                     | -                    | -                   | -                    | -                    | -       |
| Total energy intake (Kcal/day) (Mean±SE)         | 1,711.3±2.8           | 1,647.4±2.7          | 1,748.8±2.5         | 1,834.4±2.4          | 1,933.9±3.0          | <0.0001 |
| Dietary intake (grams/day) (Mean±SE)             |                       |                      |                     |                      |                      |         |
| Red meat                                         | 50.7±0.2              | 49.3±0.2             | 54.6±0.2            | 59.6±0.2             | 66.6±0.3             | <0.0001 |
| Chicken/duck                                     | 14.0±0.1              | 13.5±0.1             | 15.2±0.1            | 16.4±0.1             | 18.6±0.1             | <0.0001 |
| Seafood                                          | 46.8±0.3              | 45.4±0.3             | 49.7±0.2            | 53.7±0.2             | 58.8±0.3             | <0.0001 |
| Vegetables                                       | 291.2±1.1             | 267.5±1.0            | 303.8±1.0           | 337.8±1.0            | 378.3±1.3            | <0.0001 |
| Fruits                                           | 186.3±1.0             | 216.3±1.1            | 218.7±1.0           | 218.4±0.9            | 225.4±1.1            | <0.0001 |
| Family history of cancer                         | 25.3                  | 26.9                 | 27.3                | 28.4                 | 28.6                 | <0.0001 |
| Peanuts (Mean±SE) (Range)                        | 0.002±0.02 (0.0-0.07) | 0.3±0.02 (0.15-0.65) | 0.8±0.02 (0.7-1.31) | 1.7±0.02 (1.05-2.54) | 6.9±0.04 (2.6-132.5) | <0.0001 |
| Metabolic conditions <sup>e</sup>                | 35.4                  | 28.1                 | 30.5                | 33.5                 | 35.2                 | <0.0001 |

Abbreviations: MET: metabolic equivalent; SE: standard error

Nut/Peanut intake quintile cut-points (grams/day):

SMHS/SWHS data: Q1 (<0.14); Q2 (0.14- less than 0.72); Q3 (0.72-less than 1.45); Q4 (1.45-less than 2.54); Q5 (≥2.54)

<sup>a</sup>Income:

SMHS: low (<500 *yuan*/month per capita); lower-middle (500-999 *yuan*/moth per capita); upper-middle (1,000-1,999 *yuan*/month per capita); and high (>2,000 *yuan*/month per capita)

SWHS: low (<10,000 *yuan*/year per household); lower-middle (10,000-19,999 *yuan*/year per household); upper-middle (20,000-29,999 *yuan*/year per household); and high (≥30,000 *yuan*/year per household).

<sup>b</sup>Analysis in SMHS only.

<sup>c</sup>Charles comorbidity index: calculated based on number of existing chronic diseases.

<sup>d</sup>Self-reported.

<sup>e</sup>Metabolic condition: a person has one or more of the following conditions: history of hypertension, diabetes, history of heart disease, BMI≥30, unspecified dyslipidemia.

-: Data not available. Prevalence of disease conditions



**eTable 3. Association of Nut/Peanut Intake with Cause-specific Mortality, by Race/Ethnicity and Gender**

| Causes of Death and Quintiles | Americans of African Descent (SCCS) <sup>a</sup> |                         |             |                         | Americans of European Descents (SCCS) <sup>a</sup> |                         |             |                         | Asian Ancestry (SMHS/SWHS) <sup>b</sup> |                         |             |                         |
|-------------------------------|--------------------------------------------------|-------------------------|-------------|-------------------------|----------------------------------------------------|-------------------------|-------------|-------------------------|-----------------------------------------|-------------------------|-------------|-------------------------|
|                               | Men                                              |                         | Women       |                         | Men                                                |                         | Women       |                         | Men                                     |                         | Women       |                         |
|                               | # of deaths                                      | aHR (95% CI)            | # of deaths | aHR (95% CI)            | # of deaths                                        | aHR (95% CI)            | # of deaths | aHR (95% CI)            | # of deaths                             | aHR (95% CI)            | # of deaths | aHR (95% CI)            |
| <b>Cancer</b>                 |                                                  |                         |             |                         |                                                    |                         |             |                         |                                         |                         |             |                         |
| Quintile 1                    | 105                                              | Ref.                    | 143         | Ref.                    | 45                                                 | Ref.                    | 53          | Ref.                    | 390                                     | Ref.                    | 455         | Ref.                    |
| Quintile 2                    | 129                                              | 0.78 (0.59-1.02)        | 106         | 1.03 (0.78-1.35)        | 27                                                 | 0.71 (0.41-1.23)        | 72          | 1.19 (0.81-1.75)        | 112                                     | 0.91 (0.72-1.13)        | 364         | <b>0.87 (0.76-1.00)</b> |
| Quintile 3                    | 84                                               | <b>0.73 (0.54-0.99)</b> | 91          | 0.99 (0.75-1.31)        | 43                                                 | 0.70 (0.44-1.12)        | 60          | 1.07 (0.70-1.62)        | 212                                     | 0.88 (0.74-1.05)        | 434         | 0.83 (0.81-1.06)        |
| Quintile 4                    | 111                                              | 0.81 (0.61-1.08)        | 106         | 1.02 (0.77-1.34)        | 43                                                 | <b>0.61 (0.37-0.99)</b> | 43          | 0.78 (0.49-1.24)        | 403                                     | 1.01 (0.88-1.17)        | 444         | 0.92 (0.81-1.06)        |
| Quintile 5                    | 111                                              | <b>0.67 (0.50-0.90)</b> | 66          | 0.83 (0.60-1.15)        | 78                                                 | 0.79 (0.52-1.22)        | 35          | 1.03 (0.63-1.68)        | 375                                     | 0.96 (0.83-1.11)        | 343         | 0.97 (0.84-1.12)        |
| P-trend                       |                                                  | 0.58                    |             | 0.27                    |                                                    | 0.31                    |             | 0.24                    |                                         | 0.95                    |             | 0.79                    |
| <b>CVD</b>                    |                                                  |                         |             |                         |                                                    |                         |             |                         |                                         |                         |             |                         |
| Quintile 1                    | 132                                              | Ref.                    | 190         | Ref.                    | 71                                                 | Ref.                    | 62          | Ref.                    | 378                                     | Ref.                    | 445         | Ref.                    |
| Quintile 2                    | 184                                              | 0.87 (0.69-1.10)        | 115         | 0.84 (0.66-1.07)        | 39                                                 | 0.96 (0.64-1.45)        | 60          | 0.75 (0.51-1.09)        | 107                                     | 0.94 (0.75-1.17)        | 257         | <b>0.79 (0.67-0.92)</b> |
| Quintile 3                    | 125                                              | 0.97 (0.75-1.25)        | 89          | <b>0.69 (0.53-0.91)</b> | 54                                                 | <b>0.60 (0.41-0.90)</b> | 58          | 0.94 (0.64-1.37)        | 147                                     | <b>0.70 (0.57-0.85)</b> | 289         | <b>0.78 (0.67-0.91)</b> |
| Quintile 4                    | 135                                              | 0.82 (0.63-1.06)        | 101         | 0.83 (0.64-1.07)        | 57                                                 | <b>0.65 (0.44-0.96)</b> | 44          | 0.71 (0.47-1.09)        | 226                                     | <b>0.66 (0.56-0.79)</b> | 283         | <b>0.71 (0.61-0.83)</b> |
| Quintile 5                    | 152                                              | <b>0.72 (0.55-0.93)</b> | 86          | 0.91 (0.68-1.22)        | 82                                                 | <b>0.67 (0.46-0.98)</b> | 21          | <b>0.54 (0.31-0.94)</b> | 250                                     | <b>0.78 (0.66-0.93)</b> | 205         | <b>0.72 (0.61-0.86)</b> |
| P-trend                       |                                                  | <b>0.005</b>            |             | 0.95                    |                                                    | 0.15                    |             | <b>0.03</b>             |                                         | <b>&lt;0.0001</b>       |             | <b>&lt;0.0001</b>       |
| <b>Ischemic Heart Disease</b> |                                                  |                         |             |                         |                                                    |                         |             |                         |                                         |                         |             |                         |
| Quintile 1                    | 52                                               | Ref.                    | 82          | Ref.                    | 37                                                 | Ref.                    | 36          | Ref.                    | 100                                     | Ref.                    | 96          | Ref.                    |
| Quintile 2                    | 63                                               | 0.79 (0.53-1.16)        | 37          | <b>0.59 (0.39-0.89)</b> | 26                                                 | 1.27 (0.74-2.18)        | 31          | 0.65 (0.39-1.09)        | 28                                      | 0.93 (0.60-1.44)        | 64          | 0.91 (0.66-1.26)        |
| Quintile 3                    | 58                                               | 1.22 (0.82-1.83)        | 39          | 0.76 (0.51-1.14)        | 33                                                 | 0.74 (0.44-1.27)        | 28          | 0.74 (0.44-1.27)        | 37                                      | <b>0.66 (0.44-0.97)</b> | 67          | 0.83 (0.61-1.14)        |
| Quintile 4                    | 56                                               | 0.90 (0.60-1.36)        | 32          | <b>0.61 (0.39-0.94)</b> | 30                                                 | 0.77 (0.45-1.32)        | 21          | 0.57 (0.31-1.04)        | 72                                      | 0.81 (0.59-1.10)        | 61          | <b>0.70 (0.50-0.97)</b> |
| Quintile 5                    | 53                                               | <b>0.65 (0.43-1.00)</b> | 29          | 0.66 (0.40-1.09)        | 39                                                 | 0.67 (0.39-1.16)        | 11          | 0.58 (0.28-1.19)        | 69                                      | 0.80 (0.58-1.11)        | 37          | <b>0.58 (0.39-0.87)</b> |
| P-trend                       |                                                  | <b>0.05</b>             |             | 0.14                    |                                                    | 0.15                    |             | 0.25                    |                                         | 0.12                    |             | <b>0.002</b>            |
| <b>Ischemic Stroke</b>        |                                                  |                         |             |                         |                                                    |                         |             |                         |                                         |                         |             |                         |
| Quintile 1                    | 11                                               | Ref.                    | 17          | Ref.                    | 3                                                  | Ref.                    | 6           | Ref.                    | 82                                      | Ref.                    | 106         | Ref.                    |
| Quintile 2                    | 16                                               | 1.10 (0.48-2.50)        | 5           | 0.58 (0.21-1.62)        | 1                                                  | 0.73 (0.07-8.18)        | 2           | 0.23 (0.03-1.57)        | 28                                      | 1.22 (0.79-1.90)        | 60          | 0.80 (0.58-1.10)        |
| Quintile 3                    | 7                                                | 0.78 (0.28-2.14)        | 6           | 0.59 (0.21-1.67)        | 1                                                  | 0.30 (0.03-3.31)        | 2           | 0.41 (0.06-2.97)        | 30                                      | 0.72 (0.47-1.10)        | 71          | 0.84 (0.62-1.14)        |
| Quintile 4                    | 7                                                | 0.65 (0.23-1.78)        | 10          | 1.18 (0.49-2.85)        | 3                                                  | 0.70 (0.02-4.06)        | 2           | 0.22 (0.02-2.89)        | 42                                      | <b>0.58 (0.39-0.86)</b> | 68          | <b>0.71 (0.52-0.97)</b> |
| Quintile 5                    | 8                                                | 0.64 (0.24-1.73)        | 9           | 1.36 (0.53-3.53)        | 5                                                  | 0.67 (0.12-3.83)        | 0           | - <sup>  </sup>         | 52                                      | 0.79 (0.54-1.14)        | 49          | 0.72 (0.51-1.03)        |
| P-trend                       |                                                  | 0.08                    |             | 0.47                    |                                                    | 0.43                    |             | 0.35                    |                                         | <b>0.02</b>             |             | <b>0.03</b>             |
| <b>Hemorrhagic Stroke</b>     |                                                  |                         |             |                         |                                                    |                         |             |                         |                                         |                         |             |                         |
| Quintile 1                    | 3                                                | Ref.                    | 12          | Ref.                    | 3                                                  | Ref.                    | 2           | Ref.                    | 75                                      | Ref.                    | 105         | Ref.                    |
| Quintile 2                    | 5                                                | 1.11 (0.26-4.75)        | 7           | 0.78 (0.30-2.01)        | 1                                                  | 0.60 (0.05-7.78)        | 4           | - <sup>  </sup>         | 33                                      | 1.38 (0.90-2.12)        | 62          | <b>0.74 (0.54-1.01)</b> |
| Quintile 3                    | 4                                                | 1.25 (0.27-5.86)        | 8           | 0.88 (0.35-2.19)        | 2                                                  | 0.49 (0.05-4.76)        | 0           | - <sup>  </sup>         | 37                                      | 0.85 (0.56-1.27)        | 60          | <b>0.63 (0.44-0.86)</b> |
| Quintile 4                    | 6                                                | 1.36 (0.30-6.04)        | 7           | 0.69 (0.26-1.81)        | 5                                                  | 0.73 (0.09-5.91)        | 1           | - <sup>  </sup>         | 49                                      | 0.74 (0.51-1.07)        | 68          | <b>0.66 (0.49-0.91)</b> |
| Quintile 5                    | 14                                               | 2.98 (0.76-11.58)       | 9           | 0.89 (0.35-2.26)        | 2                                                  | 0.62 (0.06-6.14)        | 1           | - <sup>  </sup>         | 51                                      | 0.80 (0.55-1.16)        | 57          | 0.77 (0.55-1.07)        |
| P-trend                       |                                                  | <b>0.02</b>             |             | 0.25                    |                                                    | 0.90                    |             | - <sup>  </sup>         |                                         | <b>0.05</b>             |             | <b>0.03</b>             |
| <b>Other CVD</b>              |                                                  |                         |             |                         |                                                    |                         |             |                         |                                         |                         |             |                         |
| Quintile 1                    | 44                                               | Ref.                    | 60          | Ref.                    | 26                                                 | Ref.                    | 13          | Ref.                    | 121                                     | Ref.                    | 138         | Ref.                    |
| Quintile 2                    | 73                                               | 0.94 (0.64-1.38)        | 50          | 1.15 (0.18-1.69)        | 8                                                  | 0.49 (0.22-1.12)        | 18          | 0.97 (0.46-2.04)        | 18                                      | <b>0.48 (0.29-0.80)</b> | 71          | <b>0.72 (0.54-0.97)</b> |
| Quintile 3                    | 39                                               | 0.79 (0.50-1.24)        | 29          | 0.63 (0.39-1.02)        | 14                                                 | <b>0.34 (0.16-0.74)</b> | 20          | 1.63 (0.79-3.37)        | 43                                      | <b>0.64 (0.44-0.91)</b> | 91          | 0.83 (0.63-1.09)        |
| Quintile 4                    | 46                                               | 0.77 (0.50-1.19)        | 43          | 1.06 (0.70-1.61)        | 14                                                 | <b>0.38 (0.18-0.78)</b> | 14          | 1.22 (0.55-2.71)        | 63                                      | <b>0.55 (0.40-0.76)</b> | 86          | <b>0.74 (0.56-0.98)</b> |
| Quintile 5                    | 51                                               | <b>0.65 (0.42-1.00)</b> | 27          | 0.96 (0.58-1.57)        | 26                                                 | <b>0.51 (0.27-0.98)</b> | 7           | 0.73 (0.25-2.18)        | 78                                      | 0.77 (0.57-1.03)        | 62          | 0.79 (0.58-1.08)        |
| P-trend                       |                                                  | <b>0.04</b>             |             | 0.82                    |                                                    | 0.32                    |             | 0.28                    |                                         | <b>0.02</b>             |             | 0.09                    |
| <b>Diabetes</b>               |                                                  |                         |             |                         |                                                    |                         |             |                         |                                         |                         |             |                         |
| Quintile 1                    | 30                                               | Ref.                    | 40          | Ref.                    | 7                                                  | Ref.                    | 11          | Ref.                    | 34                                      | Ref.                    | 108         | Ref.                    |
| Quintile 2                    | 30                                               | 0.65 (0.57-1.12)        | 27          | 1.02 (0.61-1.71)        | 5                                                  | 1.73 (0.48-6.24)        | 10          | 0.75 (0.31-1.84)        | 13                                      | 1.43 (0.74-2.74)        | 50          | <b>0.71 (0.51-1.00)</b> |
| Quintile 3                    | 22                                               | 0.76 (0.42-1.39)        | 23          | 0.92 (0.53-1.59)        | 6                                                  | 1.02 (0.28-3.71)        | 6           | 0.48 (0.16-1.43)        | 19                                      | 1.02 (0.56-1.85)        | 36          | <b>0.48 (0.33-0.70)</b> |
| Quintile 4                    | 22                                               | 0.61 (0.34-1.10)        | 25          | 0.96 (0.55-1.65)        | 14                                                 | 2.15 (0.72-6.40)        | 10          | 0.92 (0.36-2.37)        | 25                                      | 0.86 (0.50-1.47)        | 71          | 0.91 (0.67-1.25)        |

|                 |    |                         |    |                  |    |                  |   |                  |    |                  |    |                  |
|-----------------|----|-------------------------|----|------------------|----|------------------|---|------------------|----|------------------|----|------------------|
| Quintile 5      | 26 | <b>0.54 (0.30-0.99)</b> | 10 | 0.51 (0.24-1.10) | 10 | 1.06 (0.33-3.45) | 4 | 0.59 (0.17-2.07) | 34 | 1.38 (0.83-2.30) | 49 | 0.84 (0.59-1.20) |
| <i>P</i> -trend |    | 0.70                    |    | <b>0.04</b>      |    | 0.86             |   | 0.97             |    | 0.58             |    | 0.38             |

Abbreviation: aHR: adjusted hazard ratio; CI: confidence interval; CVD: cardiovascular disease

Nut/Peanut intake quintile cut-points (grams/day):

SMHS/SWHS data (Peanut intake): Q1 (<0.14); Q2 (0.14- less than 0.72); Q3 (0.72-less than 1.45); Q4(1.45-less than 2.54); Q5 (≥2.54)

SCCS data (Total nut and peanut butter intake): Q1 (<0.95); Q2 (0.95-less than 3.08); Q3 (3.08-less than 7.30); Q4 (7.30-less than 18.45); Q5 (≥18.45)

Model adjusted for:

<sup>a</sup>Age, education, occupation, household income, marital status, smoking pack-years, alcohol consumption, BMI, physical activity, vitamin supplement use, Charles comorbidity index, metabolic conditions, total energy intake, red meat intake, chicken intake, seafood intake, vegetable intake, and fruit intake.

<sup>b</sup>Age, education, occupation, household income (SMHS) or income per capita (SWHS), smoking status, alcohol consumption (tertile-SMHS; ever/never-SWHS), BMI, physical activity, regular tea consumption, Charles comorbidity index, metabolic conditions, total energy intake, red meat intakes, chicken/duck intake, seafood intake, vegetable intake, and fruit intake.

<sup>c</sup>Small number, estimate could not be calculated.

Metabolic Condition: Participant had at least one of the following conditions: hypertension, obesity, history of heart disease, BMI≥30, unspecified dyslipidemia (SMHS and SWHS only) or hypercholesterolemia (SCCS only)

**eTable 4A. Sensitivity Analysis: Association of Nut and Peanut Butter Intake With Total Mortality in the SCCS and Peanut Intake with Total Mortality in the SMHS/SWHS (After Excluding Participants With a Follow-up Time of 2 Years of Less)**

|                                                    | Total <sup>a</sup> |                         | Men <sup>b</sup> |                         | Women <sup>b</sup> |                         |
|----------------------------------------------------|--------------------|-------------------------|------------------|-------------------------|--------------------|-------------------------|
|                                                    | # of deaths        | aHR (95% CI)            | # of deaths      | aHR (95% CI)            | # deaths           | aHR (95% CI)            |
| <b>SCCS</b>                                        |                    |                         |                  |                         |                    |                         |
| <b>Americans of African &amp; European descent</b> |                    |                         |                  |                         |                    |                         |
| <b>Total Nut and Peanut butter Intake</b>          |                    |                         |                  |                         |                    |                         |
| Total Mortality                                    |                    |                         |                  |                         |                    |                         |
| Quintile 1*                                        | 1,250              | Ref.                    | 526              | Ref.                    | 724                | Ref.                    |
| Quintile 2                                         | 1,138              | <b>0.87 (0.80-0.94)</b> | 597              | <b>0.86 (0.76-0.98)</b> | 541                | <b>0.87 (0.77-0.98)</b> |
| Quintile 3                                         | 928                | <b>0.82 (0.74-0.89)</b> | 487              | <b>0.84 (0.73-0.96)</b> | 441                | <b>0.80 (0.70-0.91)</b> |
| Quintile 4                                         | 1,045              | <b>0.83 (0.76-0.90)</b> | 560              | <b>0.79 (0.69-0.90)</b> | 485                | <b>0.88 (0.78-1.00)</b> |
| Quintile 5                                         | 1,005              | <b>0.77 (0.70-0.85)</b> | 681              | <b>0.76 (0.67-0.86)</b> | 324                | <b>0.80 (0.69-0.92)</b> |
| <i>P</i> -trend                                    |                    | <b>&lt;0.001</b>        |                  | <b>0.003</b>            |                    | 0.09                    |
| <b>Peanut Intake-- SMHS/SWHS</b>                   |                    |                         |                  |                         |                    |                         |
| <b>Asian Ancestry</b>                              |                    |                         |                  |                         |                    |                         |
| Total Mortality                                    |                    |                         |                  |                         |                    |                         |
| Quintile 1                                         |                    |                         |                  |                         |                    |                         |
| Quintile 2                                         | 2,120              | Ref.                    | 892              | Ref.                    | 1,228              | Ref.                    |
| Quintile 3                                         | 1,040              | <b>0.81 (0.75-0.88)</b> | 247              | <b>0.88 (0.76-1.02)</b> | 793                | <b>0.79 (0.72-0.86)</b> |
| Quintile 4                                         | 1,298              | <b>0.79 (0.74-0.85)</b> | 407              | <b>0.77 (0.69-0.87)</b> | 891                | <b>0.80 (0.73-0.87)</b> |
| Quintile 5                                         | 1,656              | <b>0.81 (0.76-0.87)</b> | 722              | <b>0.83 (0.75-0.92)</b> | 934                | <b>0.80 (0.73-0.87)</b> |
| <i>P</i> -trend                                    | 1,417              | <b>0.84 (0.78-0.90)</b> | 722              | <b>0.87 (0.78-0.96)</b> | 695                | <b>0.82 (0.75-0.91)</b> |
|                                                    |                    | <b>&lt;0.001</b>        |                  | <b>0.001</b>            |                    | <b>&lt;0.001</b>        |

Abbreviations: aHR: adjusted hazard ratio; CI: confidence interval

\*Nut/Peanut intake quintile cut-points (grams/day):

SMHS/SWHS data: Q1 (<0.14); Q2 (0.14- less than 0.72); Q3 (0.72-less than 1.45); Q4 (1.45-less than 2.54); Q5 (≥2.54)

SCCS data:

Total nuts & peanut butter: Q1 (<0.95); Q2 (0.95-less than 3.08); Q3 (3.08-less than 7.30); Q4 (7.30-less than 18.45); Q5 (≥18.45)

Nut only: Q1 (<0.36); Q2 (0.36-less than 0.66); Q3 (0.66-less than 4.14); Q4 (4.14-less than 8.63); Q5 (≥8.63)

Peanut butter only: Q1 (<0.19); Q2 (0.19-less than 0.59); Q3 (0.59-less than 2.18); Q4 (2.18-less than 6.32); Q5 ( $\geq$ 6.32)

Model adjusted for:

<sup>a</sup>Age, sex, race, education, occupation, household income, marital status, smoking pack-years, alcohol consumption, BMI, physical activity, vitamin supplement use, Charlson comorbidity index, metabolic conditions\*\*, total energy intake, red meat intake, chicken intake, seafood intake, vegetable intake, and fruit intake.

<sup>b</sup>Age, race, education, occupation, household income, marital status, smoking pack-years, alcohol consumption, BMI, physical activity, vitamin supplement use, Charlson comorbidity index, metabolic conditions\*\*, total energy intake, red meat intake, chicken intake, seafood intake, vegetable intake, and fruit intake.

<sup>c</sup>Age, sex, education, occupation, household income (SMHS) or income per capita (SWHS), smoking status, alcohol consumption (ever/never), BMI, physical activity, regular tea consumption, metabolic conditions\*\*, Charlson comorbidity index, total energy intake, red meat intake, chicken/duck intake, seafood intake, vegetable intake, and fruit intake.

<sup>d</sup>Age, education, occupation, household income (SMHS) or income per capita (SWHS), smoking status, alcohol consumption (tertile-SMHS; ever/never-SWHS), BMI, physical activity, regular tea consumption, metabolic conditions\*\*, Charlson comorbidity index, total energy intake, red meat intake, chicken/duck intake, seafood intake, vegetable intake, and fruit intake.

\*\*One or more of the following conditions: history of hypertension, diabetes, history of heart disease, BMI $\geq$ 30, unspecified dyslipidemia (SMHS and SWHS only), or hypercholesterolemia (SCCS only)

**eTable 4B. Sensitivity Analysis: Association of Nut/Peanut Intake with Cause-specific Mortality, by Race/Ethnicity (After Excluding Participants With a Follow-up Time of 2 Years of Less)**

| Causes of Death and Quintiles* | Americans of African Descent (SCCS) <sup>a</sup> |                         | Americans of European Descent (SCCS) <sup>a</sup> |                         | Asian Ancestry (SMHS/SWHS) <sup>b</sup> |                         |
|--------------------------------|--------------------------------------------------|-------------------------|---------------------------------------------------|-------------------------|-----------------------------------------|-------------------------|
|                                | # of Deaths                                      | aHR (95% CI)            | # of Deaths                                       | aHR (95% CI)            | # of Deaths                             | aHR (95% CI)            |
| <b>Cancer</b>                  |                                                  |                         |                                                   |                         |                                         |                         |
| Quintile 1                     | 208                                              | Ref.                    | 66                                                | Ref.                    | 845                                     | Ref.                    |
| Quintile 2                     | 202                                              | 0.95 (0.77-1.17)        | 61                                                | 0.91 (0.65-1.28)        | 476                                     | 0.91 (0.80-1.02)        |
| Quintile 3                     | 150                                              | 0.90 (0.72-1.13)        | 57                                                | 0.83 (0.59-1.17)        | 646                                     | 0.92 (0.83-1.03)        |
| Quintile 4                     | 184                                              | 0.94 (0.76-1.18)        | 55                                                | <b>0.70 (0.49-1.00)</b> | 847                                     | 0.98 (0.88-1.09)        |
| Quintile 5                     | 154                                              | <b>0.78 (0.62-0.99)</b> | 74                                                | 0.99 (0.70-1.40)        | 718                                     | 0.96 (0.87-1.08)        |
| <i>P</i> -trend                |                                                  | 0.58                    |                                                   | 0.51                    |                                         | 0.86                    |
| <b>CVD</b>                     |                                                  |                         |                                                   |                         |                                         |                         |
| Quintile 1                     | 280                                              | Ref.                    | 108                                               | Ref.                    | 823                                     | Ref.                    |
| Quintile 2                     | 249                                              | <b>0.80 (0.67-0.96)</b> | 88                                                | 0.90 (0.67-1.21)        | 364                                     | <b>0.81 (0.71-0.93)</b> |
| Quintile 3                     | 185                                              | <b>0.80 (0.66-0.97)</b> | 98                                                | 0.82 (0.61-1.11)        | 436                                     | <b>0.76 (0.68-0.86)</b> |
| Quintile 4                     | 209                                              | <b>0.80 (0.66-0.98)</b> | 87                                                | <b>0.70 (0.51-0.96)</b> | 509                                     | <b>0.70 (0.62-0.78)</b> |
| Quintile 5                     | 206                                              | <b>0.75 (0.61-0.91)</b> | 89                                                | <b>0.69 (0.49-0.95)</b> | 455                                     | <b>0.77 (0.68-0.87)</b> |
| <i>P</i> -trend                |                                                  | <b>0.04</b>             |                                                   | <b>0.05</b>             |                                         | <b>&lt;0.001</b>        |
| <b>Ischemic Heart Disease</b>  |                                                  |                         |                                                   |                         |                                         |                         |
| Quintile 1                     | 115                                              | Ref.                    | 61                                                | Ref.                    | 179                                     | Ref.                    |
| Quintile 2                     | 83                                               | <b>0.64 (0.48-0.86)</b> | 50                                                | 0.92 (0.61-1.37)        | 87                                      | 0.93 (0.71-1.21)        |
| Quintile 3                     | 90                                               | 0.98 (0.74-1.32)        | 53                                                | 0.76 (0.50-1.14)        | 92                                      | <b>0.72 (0.56-0.94)</b> |
| Quintile 4                     | 79                                               | <b>0.74 (0.54-1.00)</b> | 44                                                | 0.66 (0.43-1.02)        | 117                                     | <b>0.72 (0.57-0.91)</b> |
| Quintile 5                     | 72                                               | <b>0.61 (0.43-0.85)</b> | 45                                                | 0.66 (0.42-1.03)        | 98                                      | <b>0.71 (0.54-0.91)</b> |
| <i>P</i> -trend                |                                                  | <b>0.02</b>             |                                                   | 0.17                    |                                         | <b>0.001</b>            |
| <b>Ischemic Stroke</b>         |                                                  |                         |                                                   |                         |                                         |                         |
| Quintile 1                     | 23                                               | Ref.                    | 8                                                 | Ref.                    | 174                                     | Ref.                    |
| Quintile 2                     | 18                                               | 0.99 (0.51-1.91)        | 2                                                 | 0.29 (0.06-1.44)        | 87                                      | 0.93 (0.71-1.21)        |
| Quintile 3                     | 10                                               | 0.75 (0.34-1.63)        | 3                                                 | 0.42 (0.10-1.71)        | 100                                     | 0.83 (0.65-1.07)        |
| Quintile 4                     | 16                                               | 1.02 (0.50-2.06)        | 4                                                 | 0.37 (0.09-1.58)        | 108                                     | <b>0.70 (0.55-0.90)</b> |
| Quintile 5                     | 16                                               | 1.07 (0.51-2.21)        | 5                                                 | 0.53 (0.13-2.14)        | 100                                     | 0.82 (0.64-1.06)        |
| <i>P</i> -trend                |                                                  | 0.58                    |                                                   | 0.58                    |                                         | <b>0.02</b>             |
| <b>Hemorrhagic Stroke</b>      |                                                  |                         |                                                   |                         |                                         |                         |
| Quintile 1                     | 13                                               | Ref.                    | 4                                                 | Ref.                    | 163                                     | Ref.                    |
| Quintile 2                     | 10                                               | 0.75 (0.32-1.74)        | 4                                                 | 1.61 (0.32-8.10)        | 82                                      | 0.81 (0.62-1.06)        |
| Quintile 3                     | 10                                               | 0.90 (0.39-2.09)        | 1                                                 | 0.15 (0.01-1.79)        | 90                                      | <b>0.70 (0.54-0.91)</b> |
| Quintile 4                     | 13                                               | 0.93 (0.41-2.10)        | 4                                                 | 0.51 (0.08-3.43)        | 109                                     | <b>0.69 (0.54-0.89)</b> |
| Quintile 5                     | 19                                               | 1.31 (0.60-2.87)        | 3                                                 | 0.74 (0.11-5.00)        | 96                                      | <b>0.75 (0.57-0.97)</b> |
| <i>P</i> -trend                |                                                  | 0.17                    |                                                   | 0.89                    |                                         | <b>0.006</b>            |
| <b>Other CVD</b>               |                                                  |                         |                                                   |                         |                                         |                         |
| Quintile 1                     | 94                                               | Ref.                    | 31                                                | Ref.                    | 234                                     | Ref.                    |
| Quintile 2                     | 102                                              | 0.95 (0.71-1.27)        | 24                                                | 0.80 (0.46-1.42)        | 83                                      | <b>0.65 (0.50-0.84)</b> |
| Quintile 3                     | 56                                               | <b>0.64 (0.45-0.91)</b> | 31                                                | 1.00 (0.59-1.69)        | 131                                     | <b>0.79 (0.64-0.99)</b> |
| Quintile 4                     | 77                                               | 0.87 (0.63-1.20)        | 24                                                | 0.74 (0.41-1.31)        | 140                                     | <b>0.67 (0.54-0.83)</b> |
| Quintile 5                     | 68                                               | 0.75 (0.53-1.06)        | 26                                                | 0.69 (0.38-1.26)        | 131                                     | <b>0.80 (0.64-1.00)</b> |
| <i>P</i> -trend                |                                                  | 0.35                    |                                                   | 0.11                    |                                         | <b>0.01</b>             |
| <b>Diabetes</b>                |                                                  |                         |                                                   |                         |                                         |                         |
| Quintile 1                     | 58                                               | Ref.                    | 16                                                | Ref.                    | 142                                     | Ref.                    |
| Quintile 2                     | 48                                               | 0.84 (0.56-1.27)        | 13                                                | 0.95 (0.44-2.06)        | 63                                      | 0.71 (0.52-0.98)        |
| Quintile 3                     | 42                                               | 0.93 (0.60-1.43)        | 12                                                | 0.69 (0.30-1.59)        | 55                                      | <b>0.56 (0.40-0.78)</b> |
| Quintile 4                     | 40                                               | 0.78 (0.50-1.22)        | 17                                                | 1.05 (0.50-2.19)        | 87                                      | 0.87 (0.66-1.14)        |
| Quintile 5                     | 33                                               | <b>0.61 (0.37-0.99)</b> | 13                                                | 0.73 (0.32-1.69)        | 92                                      | 0.99 (0.74-1.33)        |

P-trend

0.25

0.59

0.80

Abbreviation: aHR: adjusted hazard ratio; CI: confidence interval; CVD: cardiovascular disease

\*Nut/peanut intake quintile cut-points (grams/day):

SMHS/SWHS data (Peanut intake): Q1 (<0.14); Q2 (0.14- less than 0.72); Q3 (0.72-less than 1.45); Q4 (1.45-less than 2.54); Q5 ( $\geq$ 2.54)

SCCS data (Total nut and peanut butter intake): Q1 (<0.95); Q2 (0.95-less than 3.08); Q3 (3.08-less than 7.30); Q4 (7.30-less than 18.45); Q5 ( $\geq$ 18.45)

Model adjusted for:

<sup>a</sup>Age, sex, education, occupation, household income, marital status, smoking pack-years, alcohol consumption, BMI, physical activity, vitamin supplement use, Charlson comorbidity index, metabolic conditions\*\*, total energy intake, red meat intake, chicken intake, seafood intake, vegetable intake, and fruit intake.

<sup>b</sup>Age, sex, education, occupation, household income (SMHS) or income per capita (SWHS), smoking status, alcohol consumption (ever/never), BMI, physical activity, regular tea consumption, Charlson comorbidity index, metabolic conditions\*\*, total energy intake, red meat intake, chicken/duck intake, seafood intake, vegetable intake, and fruit intake.

\*\*One or more of the following conditions: history of hypertension, diabetes, history of heart disease, BMI $\geq$ 30, unspecified dyslipidemia (SMHS and SWHS only), or hypercholesterolemia (SCCS only)

**eTable 5A. Sensitivity Analysis: Association of Nut and Peanut Butter Intake With Total Mortality in SCCS and Peanut Intake With Total Mortality in the SMHS/SWHS (After Excluding Participants' Prior Hypertension Status)**

|                                                    | Total <sup>a</sup> |                         | Men <sup>b</sup> |                         | Women <sup>b</sup> |                         |
|----------------------------------------------------|--------------------|-------------------------|------------------|-------------------------|--------------------|-------------------------|
|                                                    | # of deaths        | aHR (95% CI)            | # of deaths      | aHR (95% CI)            | # deaths           | aHR (95% CI)            |
| <b>SCCS</b>                                        |                    |                         |                  |                         |                    |                         |
| <b>Americans of African &amp; European descent</b> |                    |                         |                  |                         |                    |                         |
| <b>Total Nut and Peanut butter Intake</b>          |                    |                         |                  |                         |                    |                         |
| Total Mortality                                    |                    |                         |                  |                         |                    |                         |
| Quintile 1*                                        | 1,146              | Ref.                    | 484              | Ref.                    | 662                | Ref.                    |
| Quintile 2                                         | 1,054              | <b>0.87 (0.79-0.95)</b> | 556              | <b>0.87 (0.76-0.99)</b> | 498                | <b>0.88 (0.77-0.99)</b> |
| Quintile 3                                         | 859                | <b>0.82 (0.74-0.90)</b> | 457              | <b>0.86 (0.75-0.98)</b> | 402                | <b>0.79 (0.69-0.90)</b> |
| Quintile 4                                         | 949                | <b>0.81 (0.73-0.88)</b> | 516              | <b>0.79 (0.69-0.90)</b> | 433                | <b>0.85 (0.74-0.97)</b> |
| Quintile 5                                         | 950                | <b>0.77 (0.70-0.85)</b> | 644              | <b>0.76 (0.67-0.87)</b> | 306                | <b>0.81 (0.69-0.94)</b> |
| P-trend                                            |                    | <b>&lt;0.001</b>        |                  | <b>0.005</b>            |                    | 0.10                    |
| <b>Peanut Intake -- SMHS/SWHS</b>                  |                    |                         |                  |                         |                    |                         |
| <b>Asian Ancestry</b>                              |                    |                         |                  |                         |                    |                         |
| Total Mortality                                    |                    |                         |                  |                         |                    |                         |
| Quintile 1                                         | 2,140              | Ref.                    | 899              | Ref.                    | 1,241              | Ref.                    |
| Quintile 2                                         | 1,045              | <b>0.81 (0.75-0.87)</b> | 245              | <b>0.87 (0.75-1.00)</b> | 800                | <b>0.79 (0.72-0.86)</b> |
| Quintile 3                                         | 1,295              | <b>0.78 (0.73-0.84)</b> | 401              | <b>0.76 (0.67-0.85)</b> | 894                | <b>0.79 (0.72-0.86)</b> |
| Quintile 4                                         | 1,666              | <b>0.81 (0.76-0.87)</b> | 726              | <b>0.83 (0.75-0.92)</b> | 940                | <b>0.80 (0.73-0.87)</b> |
| Quintile 5                                         | 1,417              | <b>0.84 (0.78-0.90)</b> | 718              | <b>0.86 (0.78-0.96)</b> | 699                | <b>0.82 (0.75-0.91)</b> |
| P-trend                                            |                    | <b>&lt;0.001</b>        |                  | <b>0.001</b>            |                    | <b>&lt;0.001</b>        |

Abbreviations: aHR: adjusted hazard ratio; CI: confidence interval

\*Nut/Peanut intake quintile cut-points (grams/day):

SMHS/SWHS data: Q1 (<0.14); Q2 (0.14- less than 0.72); Q3 (0.72-less than 1.45); Q4 (1.45-less than 2.54); Q5 (≥2.54)

SCCS data:

Total nuts & peanut butter: Q1 (<0.95); Q2 (0.95-less than 3.08); Q3 (3.08-less than 7.30); Q4 (7.30-less than 18.45); Q5 (≥18.45)

Nut only: Q1 (<0.36); Q2 (0.36-less than 0.66); Q3 (0.66-less than 4.14); Q4 (4.14-less than 8.63); Q5 (≥8.63)

Peanut butter only: Q1 (<0.19); Q2 (0.19-less than 0.59); Q3 (0.59-less than 2.18); Q4 (2.18-less than 6.32); Q5 (≥6.32)

Model adjusted for:

<sup>a</sup>Age, sex, race, education, occupation, household income, marital status, smoking pack-years, alcohol consumption, BMI, physical activity, vitamin supplement use, Charlson comorbidity index, metabolic conditions\*\*, total energy intake, red meat intake, chicken intake, seafood intake, vegetable intake, and fruit intake.

<sup>b</sup>Age, race, education, occupation, household income, marital status, smoking pack-years, alcohol consumption, BMI, physical activity, vitamin supplement use, Charlson comorbidity index, metabolic conditions\*\*, total energy intake, red meat intake, chicken intake, seafood intake, vegetable intake, and fruit intake.

<sup>c</sup>Age, sex, education, occupation, household income (SMHS) or income per capita (SWHS), smoking status, alcohol consumption (ever/never), BMI, physical activity, regular tea consumption, metabolic conditions\*\*, Charlson comorbidity index, total energy intake, red meat intake, chicken/duck intake, seafood intake, vegetable intake, and fruit intake.

<sup>d</sup>Age, education, occupation, household income (SMHS) or income per capita (SWHS), smoking status, alcohol consumption (tertile-SMHS; ever/never-SWHS), BMI, physical activity, regular tea consumption, metabolic conditions\*\*, Charlson comorbidity index, total energy intake, red meat intake, chicken/duck intake, seafood intake, vegetable intake, and fruit intake.

\*\*One or more of the following conditions: history of hypertension, diabetes, history of heart disease, BMI $\geq$ 30, unspecified dyslipidemia (SMHS and SWHS only), or hypercholesterolemia (SCCS only)



**eTable 5B. Sensitivity Analysis: Association of Nut/Peanut Intake With Cause-Specific Mortality by Race/Ethnicity (After Excluding Participants' Prior Hypertension Status)**

| Causes of Death and Quintiles* | Americans of African Descent (SCCS) <sup>a</sup> |                         | Americans of European Descent (SCCS) <sup>a</sup> |                         | Asian Ancestry (SMHS/SWHS) <sup>b</sup> |                         |
|--------------------------------|--------------------------------------------------|-------------------------|---------------------------------------------------|-------------------------|-----------------------------------------|-------------------------|
|                                | # of Deaths                                      | aHR (95% CI)            | # of Deaths                                       | aHR (95% CI)            | # of Deaths                             | aHR (95% CI)            |
| <b>Cancer</b>                  |                                                  |                         |                                                   |                         |                                         |                         |
| Quintile 1                     | 198                                              | Ref.                    | 84                                                | Ref.                    | 788                                     | Ref.                    |
| Quintile 2                     | 191                                              | 0.91 (0.74-1.13)        | 76                                                | 0.88 (0.63-1.23)        | 459                                     | <b>0.90 (0.80-1.01)</b> |
| Quintile 3                     | 131                                              | 0.82 (0.65-1.04)        | 84                                                | 0.83 (0.59-1.16)        | 607                                     | <b>0.91 (0.82-1.01)</b> |
| Quintile 4                     | 169                                              | 0.91 (0.73-1.14)        | 73                                                | <b>0.60 (0.42-0.87)</b> | 805                                     | 0.97 (0.88-1.08)        |
| Quintile 5                     | 144                                              | <b>0.76 (0.60-0.97)</b> | 94                                                | 0.88 (0.62-1.24)        | 678                                     | 0.97 (0.87-1.08)        |
| P-trend                        |                                                  | 0.62                    |                                                   | 0.24                    |                                         | 0.92                    |
| <b>CVD</b>                     |                                                  |                         |                                                   |                         |                                         |                         |
| Quintile 1                     | 247                                              | Ref.                    | 93                                                | Ref.                    | 736                                     | Ref.                    |
| Quintile 2                     | 222                                              | <b>0.80 (0.66-0.97)</b> | 77                                                | 0.94 (0.68-1.30)        | 331                                     | <b>0.80 (0.70-0.92)</b> |
| Quintile 3                     | 158                                              | <b>0.75 (0.61-0.93)</b> | 89                                                | 0.89 (0.65-1.22)        | 401                                     | <b>0.75 (0.67-0.85)</b> |
| Quintile 4                     | 184                                              | <b>0.78 (0.63-0.95)</b> | 71                                                | <b>0.67 (0.48-0.95)</b> | 458                                     | <b>0.69 (0.61-0.77)</b> |
| Quintile 5                     | 185                                              | <b>0.72 (0.58-0.89)</b> | 87                                                | 0.77 (0.55-1.09)        | 412                                     | <b>0.76 (0.67-0.87)</b> |
| P-trend                        |                                                  | <b>0.03</b>             |                                                   | 0.18                    |                                         | <b>&lt;0.001</b>        |
| <b>Ischemic Heart Disease</b>  |                                                  |                         |                                                   |                         |                                         |                         |
| Quintile 1                     | 102                                              | Ref.                    | 53                                                | Ref.                    | 176                                     | Ref.                    |
| Quintile 2                     | 77                                               | <b>0.66 (0.48-0.90)</b> | 43                                                | 0.96 (0.62-1.47)        | 82                                      | 0.88 (0.67-1.15)        |
| Quintile 3                     | 77                                               | 0.91 (0.67-1.25)        | 49                                                | 0.86 (0.56-1.31)        | 90                                      | <b>0.73 (0.56-0.94)</b> |
| Quintile 4                     | 69                                               | <b>0.71 (0.51-0.98)</b> | 34                                                | <b>0.56 (0.35-0.90)</b> | 119                                     | <b>0.75 (0.59-0.95)</b> |
| Quintile 5                     | 62                                               | <b>0.58 (0.41-0.82)</b> | 44                                                | 0.70 (0.44-1.12)        | 97                                      | <b>0.72 (0.55-0.93)</b> |
| P-trend                        |                                                  | <b>0.01</b>             |                                                   | 0.19                    |                                         | <b>0.003</b>            |
| <b>Ischemic Stroke</b>         |                                                  |                         |                                                   |                         |                                         |                         |
| Quintile 1                     | 20                                               | Ref.                    | 6                                                 | Ref.                    | 170                                     | Ref.                    |
| Quintile 2                     | 15                                               | 0.89 (0.44-1.81)        | 2                                                 | 0.40 (0.07-2.23)        | 84                                      | 0.92 (0.70-1.20)        |
| Quintile 3                     | 10                                               | 0.80 (0.36-1.78)        | 3                                                 | 0.60 (0.13-2.72)        | 97                                      | <b>0.83 (0.64-1.06)</b> |
| Quintile 4                     | 14                                               | 0.97 (0.46-2.03)        | 4                                                 | 0.61 (0.13-2.88)        | 103                                     | <b>0.68 (0.53-0.88)</b> |
| Quintile 5                     | 13                                               | 0.85 (0.39-1.88)        | 4                                                 | 0.66 (0.13-3.37)        | 92                                      | <b>0.78 (0.60-1.02)</b> |
| P-trend                        |                                                  | 0.34                    |                                                   | 0.92                    |                                         | <b>0.006</b>            |
| <b>Hemorrhagic Stroke</b>      |                                                  |                         |                                                   |                         |                                         |                         |
| Quintile 1                     | 11                                               | Ref.                    | 3                                                 | Ref.                    | 151                                     | Ref.                    |
| Quintile 2                     | 9                                                | 0.77 (0.32-1.89)        | 2                                                 | 1.31 (0.14-12.34)       | 78                                      | 0.81 (0.61-1.07)        |
| Quintile 3                     | 8                                                | 0.80 (0.31-2.01)        | 2                                                 | 0.54 (0.05-5.88)        | 84                                      | <b>0.69 (0.53-0.91)</b> |
| Quintile 4                     | 11                                               | 0.82 (0.34-1.98)        | 2                                                 | 0.35 (0.02-5.62)        | 99                                      | <b>0.68 (0.52-0.88)</b> |
| Quintile 5                     | 17                                               | 1.20 (0.52-2.76)        | 3                                                 | 1.36 (0.13-13.73)       | 93                                      | <b>0.78 (0.60-1.02)</b> |
| P-trend                        |                                                  | 0.41                    |                                                   | 0.48                    |                                         | <b>0.01</b>             |
| <b>Other CVD</b>               |                                                  |                         |                                                   |                         |                                         |                         |
| Quintile 1                     | 80                                               | Ref.                    | 26                                                | Ref.                    | 239                                     | Ref.                    |
| Quintile 2                     | 89                                               | 0.98 (0.71-1.34)        | 23                                                | 0.91 (0.50-1.66)        | 87                                      | <b>0.66 (0.52-0.85)</b> |
| Quintile 3                     | 47                                               | <b>0.62 (0.42-0.92)</b> | 26                                                | 0.97 (0.54-1.74)        | 130                                     | <b>0.77 (0.62-0.96)</b> |
| Quintile 4                     | 70                                               | 0.91 (0.65-1.28)        | 25                                                | 0.97 (0.53-1.76)        | 137                                     | <b>0.64 (0.52-0.80)</b> |
| Quintile 5                     | 64                                               | 0.78 (0.54-1.13)        | 25                                                | 0.79 (0.41-1.51)        | 130                                     | <b>0.78 (0.62-0.98)</b> |
| P-trend                        |                                                  | 0.64                    |                                                   | 0.24                    |                                         | <b>0.004</b>            |
| <b>Diabetes</b>                |                                                  |                         |                                                   |                         |                                         |                         |
| Quintile 1                     | 45                                               | Ref.                    | 15                                                | Ref.                    | 128                                     | Ref.                    |
| Quintile 2                     | 41                                               | 0.94 (0.60-1.49)        | 12                                                | 0.94 (0.42-2.10)        | 54                                      | 0.75 (0.54-1.03)        |
| Quintile 3                     | 39                                               | 1.13 (0.71-1.81)        | 9                                                 | 0.61 (0.25-1.50)        | 51                                      | <b>0.59 (0.42-0.82)</b> |
| Quintile 4                     | 29                                               | 0.73 (0.43-1.22)        | 15                                                | 1.00 (0.46-2.19)        | 89                                      | 0.92 (0.69-1.21)        |
| Quintile 5                     | 30                                               | 0.72 (0.42-1.24)        | 13                                                | 0.78 (0.33-1.84)        | 77                                      | 1.00 (0.74-1.34)        |

P-trend

0.56

0.72

0.95

Abbreviation: aHR: adjusted hazard ratio; CI: confidence interval; CVD: cardiovascular disease

\*Nut/peanut intake quintile cut-points (grams/day):

SMHS/SWHS data (Peanut intake): Q1 (<0.14); Q2 (0.14- less than 0.72); Q3 (0.72-less than 1.45); Q4 (1.45-less than 2.54); Q5 ( $\geq$ 2.54)

SCCS data (Total nut and peanut butter intake): Q1 (<0.95); Q2 (0.95-less than 3.08); Q3 (3.08-less than 7.30); Q4 (7.30-less than 18.45); Q5 ( $\geq$ 18.45)

Model adjusted for:

<sup>a</sup>Age, sex, education, occupation, household income, marital status, smoking pack-years, alcohol consumption, BMI, physical activity, vitamin supplement use, Charlson comorbidity index, metabolic conditions\*\*, total energy intake, red meat intake, chicken intake, seafood intake, vegetable intake, and fruit intake.

<sup>b</sup>Age, sex, education, occupation, household income (SMHS) or income per capita (SWHS), smoking status, alcohol consumption (ever/never), BMI, physical activity, regular tea consumption, Charlson comorbidity index, metabolic conditions\*\*, total energy intake, red meat intake, chicken/duck intake, seafood intake, vegetable intake, and fruit intake.

\*\*One or more of the following conditions: history of hypertension, diabetes, history of heart disease, BMI $\geq$ 30, unspecified dyslipidemia (SMHS and SWHS only), or hypercholesterolemia (SCCS only)

**eTable 6A. Sensitivity Analysis: Association of Nut and Peanut Butter Intake With Total Mortality in SCCS and Peanut Intake With Total Mortality in the SMHS, SWHS (After Excluding Participants' Prior Diabetes Status)**

|                                                    | Total <sup>a</sup> |                         | Men <sup>b</sup> |                         | Women <sup>b</sup> |                         |
|----------------------------------------------------|--------------------|-------------------------|------------------|-------------------------|--------------------|-------------------------|
|                                                    | # of deaths        | aHR (95% CI)            | # of deaths      | aHR (95% CI)            | # deaths           | aHR (95% CI)            |
| <b>SCCS</b>                                        |                    |                         |                  |                         |                    |                         |
| <b>Americans of African &amp; European descent</b> |                    |                         |                  |                         |                    |                         |
| <b>Total Nut and Peanut butter Intake</b>          |                    |                         |                  |                         |                    |                         |
| Total Mortality                                    |                    |                         |                  |                         |                    |                         |
| Quintile 1*                                        | 1,302              | Ref.                    | 556              | Ref.                    | 746                | Ref.                    |
| Quintile 2                                         | 1,194              | <b>0.85 (0.79-0.93)</b> | 637              | <b>0.85 (0.75-0.96)</b> | 557                | <b>0.86 (0.77-0.97)</b> |
| Quintile 3                                         | 979                | <b>0.81 (0.74-0.88)</b> | 528              | <b>0.84 (0.74-0.96)</b> | 451                | <b>0.77 (0.68-0.88)</b> |
| Quintile 4                                         | 1,070              | <b>0.79 (0.72-0.86)</b> | 580              | <b>0.75 (0.66-0.85)</b> | 490                | <b>0.84 (0.74-0.95)</b> |
| Quintile 5                                         | 1,028              | <b>0.73 (0.66-0.80)</b> | 697              | <b>0.72 (0.63-0.81)</b> | 331                | <b>0.75 (0.65-0.87)</b> |
| P-trend                                            |                    | <b>&lt;0.001</b>        |                  | <b>&lt;0.001</b>        |                    | <b>0.005</b>            |
| <b>Peanut Intake – SMHS/SWHS</b>                   |                    |                         |                  |                         |                    |                         |
|                                                    | Total <sup>c</sup> |                         | Men <sup>d</sup> |                         | Women <sup>d</sup> |                         |
|                                                    | # of deaths        | aHR (95% CI)            | # of deaths      | aHR (95% CI)            | # deaths           | aHR (95% CI)            |
| <b>Asian Ancestry</b>                              |                    |                         |                  |                         |                    |                         |
| Total Mortality                                    |                    |                         |                  |                         |                    |                         |
| Quintile 1                                         | 2,263              | Ref.                    | 997              | Ref.                    | 1,266              | Ref.                    |
| Quintile 2                                         | 1,095              | <b>0.81 (0.75-0.87)</b> | 274              | <b>0.87 (0.76-1.00)</b> | 821                | <b>0.79 (0.72-0.86)</b> |
| Quintile 3                                         | 1,363              | <b>0.78 (0.73-0.84)</b> | 446              | <b>0.76 (0.68-0.85)</b> | 917                | <b>0.79 (0.73-0.86)</b> |
| Quintile 4                                         | 1,744              | <b>0.80 (0.75-0.86)</b> | 789              | <b>0.82 (0.74-0.90)</b> | 955                | <b>0.80 (0.73-0.87)</b> |
| Quintile 5                                         | 1,473              | <b>0.82 (0.77-0.88)</b> | 760              | <b>0.83 (0.75-0.91)</b> | 713                | <b>0.82 (0.75-0.90)</b> |
| P-trend                                            |                    | <b>&lt;0.001</b>        |                  | <b>&lt;0.001</b>        |                    | <b>&lt;0.001</b>        |

Abbreviations: aHR: adjusted hazard ratio; CI: confidence interval

\*Nut/Peanut intake quintile cut-points (grams/day):

SMHS/SWHS data: Q1 (<0.14); Q2 (0.14- less than 0.72); Q3 (0.72-less than 1.45); Q4 (1.45-less than 2.54); Q5 (≥2.54)

SCCS data:

Total nuts & peanut butter: Q1 (<0.95); Q2 (0.95-less than 3.08); Q3 (3.08-less than 7.30); Q4 (7.30-less than 18.45); Q5 (≥18.45)

Nut only: Q1 (<0.36); Q2 (0.36-less than 0.66); Q3 (0.66-less than 4.14); Q4 (4.14-less than 8.63); Q5 (≥8.63)

Peanut butter only: Q1 (<0.19); Q2 (0.19-less than 0.59); Q3 (0.59-less than 2.18); Q4 (2.18-less than 6.32); Q5 (≥6.32)

Model adjusted for:

<sup>a</sup>Age, sex, race, education, occupation, household income, marital status, smoking pack-years, alcohol consumption, BMI, physical activity, vitamin supplement use, Charlson comorbidity index, metabolic conditions\*\*, total energy intake, red meat intake, chicken intake, seafood intake, vegetable intake, and fruit intake.

<sup>b</sup>Age, race, education, occupation, household income, marital status, smoking pack-years, alcohol consumption, BMI, physical activity, vitamin supplement use, Charlson comorbidity index, metabolic conditions\*\*, total energy intake, red meat intake, chicken intake, seafood intake, vegetable intake, and fruit intake.

<sup>c</sup>Age, sex, education, occupation, household income (SMHS) or income per capita (SWHS), smoking status, alcohol consumption (ever/never), BMI, physical activity, regular tea consumption, metabolic conditions\*\*, Charlson comorbidity index, total energy intake, red meat intake, chicken/duck intake, seafood intake, vegetable intake, and fruit intake.

<sup>d</sup>Age, education, occupation, household income (SMHS) or income per capita (SWHS), smoking status, alcohol consumption (tertile-SMHS; ever/never-SWHS), BMI, physical activity, regular tea consumption, metabolic conditions\*\*, Charlson comorbidity index, total energy intake, red meat intake, chicken/duck intake, seafood intake, vegetable intake, and fruit intake.

\*\*One or more of the following conditions: history of hypertension, diabetes, history of heart disease, BMI $\geq$ 30, unspecified dyslipidemia (SMHS and SWHS only), or hypercholesterolemia (SCCS only)

**eTable 6B. Sensitivity Analysis: Association of Nut/Peanut Intake with Cause-specific Mortality, by Race/Ethnicity (After Excluding Participants' Prior Diabetes Status)**

| Causes of Death and Quintiles* | Americans of African Descent (SCCS) <sup>a</sup> |                         | Americans of European Descent (SCCS) <sup>a</sup> |                         | Asian Ancestry (SMHS/SWHS) <sup>b</sup> |                         |
|--------------------------------|--------------------------------------------------|-------------------------|---------------------------------------------------|-------------------------|-----------------------------------------|-------------------------|
|                                | # of Deaths                                      | aHR (95% CI)            | # of Deaths                                       | aHR (95% CI)            | # of Deaths                             | aHR (95% CI)            |
| <b>Cancer</b>                  |                                                  |                         |                                                   |                         |                                         |                         |
| Quintile 1                     | 231                                              | Ref.                    | 93                                                | Ref.                    | 831                                     | Ref.                    |
| Quintile 2                     | 213                                              | 0.86 (0.70-1.05)        | 90                                                | 0.91 (0.66-1.24)        | 471                                     | <b>0.89 (0.79-1.00)</b> |
| Quintile 3                     | 160                                              | 0.83 (0.67-1.03)        | 98                                                | 0.87 (0.63-1.19)        | 639                                     | <b>0.91 (0.82-1.02)</b> |
| Quintile 4                     | 198                                              | 0.87 (0.70-1.07)        | 79                                                | <b>0.62 (0.44-0.88)</b> | 839                                     | 0.97 (0.88-1.07)        |
| Quintile 5                     | 164                                              | <b>0.72 (0.58-0.91)</b> | 104                                               | 0.89 (0.64-1.25)        | 701                                     | 0.95 (0.86-1.06)        |
| P-trend                        |                                                  | 0.14                    |                                                   | 0.14                    |                                         | 0.67                    |
| <b>CVD</b>                     |                                                  |                         |                                                   |                         |                                         |                         |
| Quintile 1                     | 287                                              | Ref.                    | 114                                               | Ref.                    | 799                                     | Ref.                    |
| Quintile 2                     | 265                                              | <b>0.82 (0.69-0.97)</b> | 88                                                | 0.87 (0.65-1.16)        | 356                                     | <b>0.81 (0.71-0.92)</b> |
| Quintile 3                     | 189                                              | <b>0.77 (0.63-0.93)</b> | 103                                               | 0.80 (0.60-1.07)        | 424                                     | <b>0.74 (0.66-0.83)</b> |
| Quintile 4                     | 208                                              | <b>0.75 (0.62-0.90)</b> | 85                                                | <b>0.63 (0.46-0.85)</b> | 491                                     | <b>0.68 (0.60-0.76)</b> |
| Quintile 5                     | 203                                              | <b>0.67 (0.55-0.82)</b> | 94                                                | <b>0.65 (0.47-0.89)</b> | 439                                     | <b>0.75 (0.66-0.84)</b> |
| P-trend                        |                                                  | <b>0.001</b>            |                                                   | <b>0.04</b>             |                                         | <b>&lt;0.001</b>        |
| <b>Ischemic Heart Disease</b>  |                                                  |                         |                                                   |                         |                                         |                         |
| Quintile 1                     | 118                                              | Ref.                    | 63                                                | Ref.                    | 186                                     | Ref.                    |
| Quintile 2                     | 83                                               | <b>0.61 (0.45-0.82)</b> | 48                                                | 0.89 (0.60-1.32)        | 90                                      | 0.94 (0.72-1.21)        |
| Quintile 3                     | 89                                               | 0.93 (0.69-1.24)        | 56                                                | 0.77 (0.52-1.15)        | 99                                      | <b>0.76 (0.59-0.97)</b> |
| Quintile 4                     | 76                                               | <b>0.68 (0.50-0.93)</b> | 42                                                | <b>0.59 (0.38-0.91)</b> | 127                                     | <b>0.75 (0.60-0.95)</b> |
| Quintile 5                     | 69                                               | <b>0.57 (0.41-0.79)</b> | 46                                                | <b>0.62 (0.40-0.97)</b> | 99                                      | <b>0.69 (0.53-0.89)</b> |
| P-trend                        |                                                  | <b>0.006</b>            |                                                   | 0.13                    |                                         | <b>&lt;0.001</b>        |
| <b>Ischemic Stroke</b>         |                                                  |                         |                                                   |                         |                                         |                         |
| Quintile 1                     | 21                                               | Ref.                    | 7                                                 | Ref.                    | 183                                     | Ref.                    |
| Quintile 2                     | 19                                               | 1.06 (0.55-2.04)        | 3                                                 | 0.48 (0.11-2.06)        | 87                                      | 0.88 (0.68-1.15)        |
| Quintile 3                     | 11                                               | 0.78 (0.36-1.73)        | 3                                                 | 0.48 (0.11-2.04)        | 99                                      | <b>0.78 (0.61-1.01)</b> |
| Quintile 4                     | 15                                               | 1.03 (0.51-2.11)        | 4                                                 | 0.48 (0.11-2.12)        | 109                                     | <b>0.67 (0.52-0.85)</b> |
| Quintile 5                     | 14                                               | 0.89 (0.42-1.90)        | 5                                                 | 0.84 (0.20-3.51)        | 98                                      | <b>0.76 (0.58-0.98)</b> |
| P-trend                        |                                                  | 0.29                    |                                                   | 0.95                    |                                         | <b>0.002</b>            |
| <b>Hemorrhagic Stroke</b>      |                                                  |                         |                                                   |                         |                                         |                         |
| Quintile 1                     | 15                                               | Ref.                    | 3                                                 | Ref.                    | 177                                     | Ref.                    |
| Quintile 2                     | 11                                               | 0.70 (0.32-1.54)        | 4                                                 | 2.75 (0.44-17.21)       | 91                                      | 0.84 (0.65-1.09)        |
| Quintile 3                     | 10                                               | 0.83 (0.32-1.65)        | 2                                                 | 0.64 (0.08-5.49)        | 93                                      | <b>0.67 (0.52-0.86)</b> |
| Quintile 4                     | 12                                               | 0.67 (0.30-1.51)        | 4                                                 | 0.75 (0.09-6.24)        | 111                                     | <b>0.65 (0.51-0.83)</b> |
| Quintile 5                     | 19                                               | 1.02 (0.48-2.15)        | 3                                                 | 1.23 (0.16-9.48)        | 104                                     | <b>0.74 (0.58-0.96)</b> |
| P-trend                        |                                                  | 0.32                    |                                                   | 0.90                    |                                         | <b>0.001</b>            |
| <b>Other CVD</b>               |                                                  |                         |                                                   |                         |                                         |                         |
| Quintile 1                     | 96                                               | Ref.                    | 35                                                | Ref.                    | 253                                     | Ref.                    |
| Quintile 2                     | 112                                              | 1.00 (0.76-1.34)        | 25                                                | 0.72 (0.42-1.24)        | 88                                      | <b>0.64 (0.50-0.82)</b> |
| Quintile 3                     | 59                                               | <b>0.64 (0.45-0.90)</b> | 33                                                | 0.86 (0.52-1.43)        | 133                                     | <b>0.75 (0.60-0.93)</b> |
| Quintile 4                     | 81                                               | 0.83 (0.61-1.14)        | 26                                                | 0.66 (0.38-1.15)        | 144                                     | <b>0.64 (0.52-0.79)</b> |
| Quintile 5                     | 68                                               | <b>0.66 (0.47-0.94)</b> | 28                                                | 0.57 (0.32-1.02)        | 138                                     | <b>0.79 (0.63-0.98)</b> |
| P-trend                        |                                                  | 0.06                    |                                                   | 0.06                    |                                         | <b>0.004</b>            |
| <b>Diabetes</b>                |                                                  |                         |                                                   |                         |                                         |                         |
| Quintile 1                     | 44                                               | Ref.                    | 13                                                | Ref.                    | 123                                     | Ref.                    |
| Quintile 2                     | 44                                               | 1.02 (0.65-1.60)        | 11                                                | 0.94 (0.41-2.18)        | 52                                      | 0.74 (0.53-1.03)        |
| Quintile 3                     | 37                                               | 1.06 (0.66-1.70)        | 10                                                | 0.73 (0.30-1.77)        | 48                                      | <b>0.56 (0.40-0.80)</b> |
| Quintile 4                     | 31                                               | 0.77 (0.47-1.29)        | 13                                                | 0.91 (0.40-2.06)        | 84                                      | 0.89 (0.67-1.18)        |
| Quintile 5                     | 27                                               | 0.63 (0.36-1.09)        | 13                                                | 0.79 (0.33-1.89)        | 76                                      | 1.01 (0.74-1.36)        |

P-trend

0.32

0.66

0.92

Abbreviation: aHR: adjusted hazard ratio; CI: confidence interval; CVD: cardiovascular disease

\*Nut/peanut intake quintile cut-points (grams/day):

SMHS/SWHS data (Peanut intake): Q1 (<0.14); Q2 (0.14- less than 0.72); Q3 (0.72-less than 1.45); Q4 (1.45-less than 2.54); Q5 ( $\geq$ 2.54)

SCCS data (Total nut and peanut butter intake): Q1 (<0.95); Q2 (0.95-less than 3.08); Q3 (3.08-less than 7.30); Q4 (7.30-less than 18.45); Q5 ( $\geq$ 18.45)

Model adjusted for:

<sup>a</sup>Age, sex, education, occupation, household income, marital status, smoking pack-years, alcohol consumption, BMI, physical activity, vitamin supplement use, Charlson comorbidity index, metabolic conditions\*\*, total energy intake, red meat intake, chicken intake, seafood intake, vegetable intake, and fruit intake.

<sup>b</sup>Age, sex, education, occupation, household income (SMHS) or income per capita (SWHS), smoking status, alcohol consumption (ever/never), BMI, physical activity, regular tea consumption, Charlson comorbidity index, metabolic conditions\*\*, total energy intake, red meat intake, chicken/duck intake, seafood intake, vegetable intake, and fruit intake.

\*\*One or more of the following conditions: history of hypertension, diabetes, history of heart disease, BMI $\geq$ 30, unspecified dyslipidemia (SMHS and SWHS only), or hypercholesterolemia (SCCS only)

**eTable 7A. Sensitivity Analysis: Association of Nut and Peanut Butter Intake with Total Mortality in SCCS and Peanut Intake with Total Mortality in the SMHS/SWHS (After Excluding Participants' Prior Ischemic Heart Disease Status)**

|                                                    | Total <sup>a</sup> |                         | Men <sup>b</sup> |                         | Women <sup>b</sup> |                         |
|----------------------------------------------------|--------------------|-------------------------|------------------|-------------------------|--------------------|-------------------------|
|                                                    | # of deaths        | aHR (95% CI)            | # of deaths      | aHR (95% CI)            | # deaths           | aHR (95% CI)            |
| <b>SCCS</b>                                        |                    |                         |                  |                         |                    |                         |
| <b>Americans of African &amp; European descent</b> |                    |                         |                  |                         |                    |                         |
| <b>Total Nut and Peanut butter Intake</b>          |                    |                         |                  |                         |                    |                         |
| Total Mortality                                    |                    |                         |                  |                         |                    |                         |
| Quintile 1*                                        | 1,393              | Ref.                    | 591              | Ref.                    | 802                | Ref.                    |
| Quintile 2                                         | 1,276              | <b>0.86 (0.79-0.93)</b> | 664              | <b>0.84 (0.74-0.94)</b> | 612                | <b>0.89 (0.79-0.99)</b> |
| Quintile 3                                         | 1,032              | <b>0.80 (0.74-0.88)</b> | 546              | <b>0.83 (0.73-0.94)</b> | 486                | <b>0.78 (0.69-0.88)</b> |
| Quintile 4                                         | 1,144              | <b>0.80 (0.74-0.87)</b> | 612              | <b>0.76 (0.67-0.86)</b> | 532                | <b>0.86 (0.76-0.97)</b> |
| Quintile 5                                         | 1,102              | <b>0.75 (0.68-0.82)</b> | 743              | <b>0.73 (0.64-0.82)</b> | 359                | <b>0.78 (0.68-0.90)</b> |
| P-trend                                            |                    | <b>&lt;0.001</b>        |                  | <b>&lt;0.001</b>        |                    | <b>0.02</b>             |
| <b>Peanut Intake – SMHS/SWHS</b>                   |                    |                         |                  |                         |                    |                         |
| <b>Asian Ancestry</b>                              |                    |                         |                  |                         |                    |                         |
| Total Mortality                                    |                    |                         |                  |                         |                    |                         |
| Quintile 1                                         | 2,271              | Ref.                    | 999              | Ref.                    | 1,272              | Ref.                    |
| Quintile 2                                         | 1,102              | <b>0.81 (0.76-0.88)</b> | 277              | <b>0.88 (0.77-1.01)</b> | 825                | <b>0.79 (0.73-0.87)</b> |
| Quintile 3                                         | 1,371              | <b>0.78 (0.73-0.84)</b> | 452              | <b>0.77 (0.68-0.86)</b> | 919                | <b>0.80 (0.73-0.87)</b> |
| Quintile 4                                         | 1,741              | <b>0.80 (0.75-0.86)</b> | 788              | <b>0.81 (0.74-0.90)</b> | 953                | <b>0.80 (0.73-0.87)</b> |
| Quintile 5                                         | 1,471              | <b>0.82 (0.77-0.88)</b> | 755              | <b>0.82 (0.74-0.91)</b> | 716                | <b>0.83 (0.75-0.91)</b> |
| P-trend                                            |                    | <b>&lt;0.001</b>        |                  | <b>&lt;0.001</b>        |                    | <b>&lt;0.001</b>        |

Abbreviations: aHR: adjusted hazard ratio; CI: confidence interval

\*Nut/Peanut intake quintile cut-points (grams/day):

SMHS/SWHS data: Q1 (<0.14); Q2 (0.14- less than 0.72); Q3 (0.72-less than 1.45); Q4 (1.45-less than 2.54); Q5 (≥2.54)

SCCS data:

Total nuts & peanut butter: Q1 (<0.95); Q2 (0.95-less than 3.08); Q3 (3.08-less than 7.30); Q4 (7.30-less than 18.45); Q5 (≥18.45)

Nut only: Q1 (<0.36); Q2 (0.36-less than 0.66); Q3 (0.66-less than 4.14); Q4 (4.14-less than 8.63); Q5 (≥8.63)

Peanut butter only: Q1 (<0.19); Q2 (0.19-less than 0.59); Q3 (0.59-less than 2.18); Q4 (2.18-less than 6.32); Q5 (≥6.32)

Model adjusted for:

<sup>a</sup>Age, sex, race, education, occupation, household income, marital status, smoking pack-years, alcohol consumption, BMI, physical activity, vitamin supplement use, Charlson comorbidity index, metabolic conditions\*\*, total energy intake, red meat intake, chicken intake, seafood intake, vegetable intake, and fruit intake.

<sup>b</sup>Age, race, education, occupation, household income, marital status, smoking pack-years, alcohol consumption, BMI, physical activity, vitamin supplement use, Charlson comorbidity index, metabolic conditions\*\*, total energy intake, red meat intake, chicken intake, seafood intake, vegetable intake, and fruit intake.

<sup>c</sup>Age, sex, education, occupation, household income (SMHS) or income per capita (SWHS), smoking status, alcohol consumption (ever/never), BMI, physical activity, regular tea consumption, metabolic conditions\*\*, Charlson comorbidity index, total energy intake, red meat intake, chicken/duck intake, seafood intake, vegetable intake, and fruit intake.

<sup>d</sup>Age, education, occupation, household income (SMHS) or income per capita (SWHS), smoking status, alcohol consumption (tertile-SMHS; ever/never-SWHS), BMI, physical activity, regular tea consumption, metabolic conditions\*\*, Charlson comorbidity index, total energy intake, red meat intake, chicken/duck intake, seafood intake, vegetable intake, and fruit intake.

\*\*One or more of the following conditions: history of hypertension, diabetes, history of heart disease, BMI $\geq$ 30, unspecified dyslipidemia (SMHS and SWHS only), or hypercholesterolemia (SCCS only)



**eTable 7B. Sensitivity Analysis: Association of Nut/Peanut Intake with Cause-specific Mortality, by Race/Ethnicity (After Excluding Participants' Prior Ischemic Heart Disease Status)**

| Causes of Death and Quintiles* | Americans of African Descent (SCCS) <sup>a</sup> |                         | Americans of European Descent (SCCS) <sup>a</sup> |                         | Asian Ancestry (SMHS/SWHS) <sup>b</sup> |                         |
|--------------------------------|--------------------------------------------------|-------------------------|---------------------------------------------------|-------------------------|-----------------------------------------|-------------------------|
|                                | # of Deaths                                      | aHR (95% CI)            | # of Deaths                                       | aHR (95% CI)            | # of Deaths                             | aHR (95% CI)            |
| <b>Cancer</b>                  |                                                  |                         |                                                   |                         |                                         |                         |
| Quintile 1                     | 240                                              | Ref.                    | 93                                                | Ref.                    | 833                                     | Ref.                    |
| Quintile 2                     | 230                                              | 0.90 (0.74-1.09)        | 92                                                | 0.95 (0.70-1.30)        | 473                                     | <b>0.89 (0.79-1.00)</b> |
| Quintile 3                     | 174                                              | 0.88 (0.71-1.08)        | 96                                                | 0.87 (0.63-1.19)        | 639                                     | <b>0.91 (0.82-1.01)</b> |
| Quintile 4                     | 211                                              | 0.92 (0.75-1.12)        | 82                                                | <b>0.66 (0.47-0.93)</b> | 828                                     | 0.95 (0.86-1.05)        |
| Quintile 5                     | 175                                              | <b>0.77 (0.61-0.95)</b> | 108                                               | 0.94 (0.68-1.31)        | 703                                     | 0.95 (0.85-1.05)        |
| <i>P</i> -trend                |                                                  | <b>0.36</b>             |                                                   | 0.26                    |                                         | 0.54                    |
| <b>CVD</b>                     |                                                  |                         |                                                   |                         |                                         |                         |
| Quintile 1                     | 303                                              | Ref.                    | 115                                               | Ref.                    | 790                                     | Ref.                    |
| Quintile 2                     | 277                                              | <b>0.82 (0.69-0.97)</b> | 92                                                | 0.86 (0.64-1.15)        | 356                                     | <b>0.82 (0.72-0.93)</b> |
| Quintile 3                     | 199                                              | <b>0.79 (0.65-0.95)</b> | 98                                                | <b>0.72 (0.54-0.97)</b> | 424                                     | <b>0.75 (0.66-0.85)</b> |
| Quintile 4                     | 221                                              | <b>0.79 (0.66-0.95)</b> | 87                                                | <b>0.62 (0.46-0.84)</b> | 493                                     | <b>0.69 (0.61-0.77)</b> |
| Quintile 5                     | 226                                              | <b>0.76 (0.62-0.92)</b> | 99                                                | <b>0.68 (0.50-0.93)</b> | 433                                     | <b>0.75 (0.66-0.84)</b> |
| <i>P</i> -trend                |                                                  | <b>0.04</b>             |                                                   | 0.09                    |                                         | <b>&lt;0.001</b>        |
| <b>Ischemic Heart Disease</b>  |                                                  |                         |                                                   |                         |                                         |                         |
| Quintile 1                     | 128                                              | Ref.                    | 60                                                | Ref.                    | 182                                     | Ref.                    |
| Quintile 2                     | 89                                               | <b>0.61 (0.46-0.81)</b> | 53                                                | 0.95 (0.65-1.41)        | 90                                      | 0.96 (0.74-1.24)        |
| Quintile 3                     | 90                                               | 0.90 (0.68-1.19)        | 53                                                | 0.73 (0.49-1.09)        | 101                                     | <b>0.79 (0.62-1.01)</b> |
| Quintile 4                     | 80                                               | <b>0.68 (0.50-0.92)</b> | 43                                                | <b>0.61 (0.40-0.94)</b> | 127                                     | <b>0.77 (0.61-0.98)</b> |
| Quintile 5                     | 75                                               | <b>0.58 (0.42-0.80)</b> | 48                                                | 0.69 (0.45-1.08)        | 101                                     | <b>0.72 (0.56-0.93)</b> |
| <i>P</i> -trend                |                                                  | <b>0.008</b>            |                                                   | 0.21                    |                                         | <b>0.003</b>            |
| <b>Ischemic Stroke</b>         |                                                  |                         |                                                   |                         |                                         |                         |
| Quintile 1                     | 27                                               | Ref.                    | 8                                                 | Ref.                    | 182                                     | Ref.                    |
| Quintile 2                     | 19                                               | 0.84 (0.45-1.56)        | 3                                                 | 0.46 (0.11-1.87)        | 87                                      | 0.90 (0.70-1.17)        |
| Quintile 3                     | 12                                               | 0.68 (0.33-1.42)        | 3                                                 | 0.45 (0.11-1.84)        | 98                                      | <b>0.79 (0.61-1.01)</b> |
| Quintile 4                     | 17                                               | 0.92 (0.47-1.78)        | 4                                                 | 0.39 (0.09-1.64)        | 109                                     | <b>0.68 (0.53-0.87)</b> |
| Quintile 5                     | 17                                               | 0.98 (0.50-1.95)        | 4                                                 | 0.43 (0.10-1.90)        | 101                                     | <b>0.78 (0.61-1.01)</b> |
| <i>P</i> -trend                |                                                  | 0.58                    |                                                   | 0.50                    |                                         | <b>0.005</b>            |
| <b>Hemorrhagic Stroke</b>      |                                                  |                         |                                                   |                         |                                         |                         |
| Quintile 1                     | 14                                               | Ref.                    | 4                                                 | Ref.                    | 175                                     | Ref.                    |
| Quintile 2                     | 12                                               | 0.81 (0.37-1.77)        | 4                                                 | 1.45 (0.30-6.95)        | 90                                      | 0.85 (0.65-1.10)        |
| Quintile 3                     | 11                                               | 0.87 (0.39-1.95)        | 2                                                 | 0.42 (0.06-2.75)        | 93                                      | <b>0.68 (0.53-0.88)</b> |
| Quintile 4                     | 13                                               | 0.83 (0.37-1.83)        | 6                                                 | 1.00 (0.20-4.98)        | 115                                     | <b>0.69 (0.54-0.87)</b> |
| Quintile 5                     | 22                                               | 1.34 (0.64-2.80)        | 3                                                 | 0.94 (0.16-5.61)        | 101                                     | <b>0.73 (0.57-0.95)</b> |
| <i>P</i> -trend                |                                                  | <b>0.02</b>             |                                                   | 0.95                    |                                         | <b>0.002</b>            |
| <b>Other CVD</b>               |                                                  |                         |                                                   |                         |                                         |                         |
| Quintile 1                     | 97                                               | Ref.                    | 36                                                | Ref.                    | 257                                     | Ref.                    |
| Quintile 2                     | 116                                              | 1.04 (0.79-1.38)        | 25                                                | 0.71 (0.41-1.22)        | 89                                      | <b>0.65 (0.51-0.83)</b> |
| Quintile 3                     | 63                                               | <b>0.70 (0.50-0.98)</b> | 29                                                | 0.70 (0.41-1.19)        | 132                                     | <b>0.74 (0.60-0.92)</b> |
| Quintile 4                     | 83                                               | 0.90 (0.66-1.23)        | 25                                                | 0.62 (0.36-1.07)        | 142                                     | <b>0.64 (0.51-0.79)</b> |
| Quintile 5                     | 76                                               | 0.78 (0.56-1.09)        | 32                                                | 0.67 (0.38-1.17)        | 132                                     | <b>0.75 (0.60-0.94)</b> |
| <i>P</i> -trend                |                                                  | 0.19                    |                                                   | 0.19                    |                                         | <b>0.001</b>            |
| <b>Diabetes</b>                |                                                  |                         |                                                   |                         |                                         |                         |
| Quintile 1                     | 65                                               | Ref.                    | 17                                                | Ref.                    | 139                                     | Ref.                    |
| Quintile 2                     | 52                                               | 0.81 (0.55-1.21)        | 14                                                | 1.00 (0.47-2.12)        | 59                                      | 0.77 (0.56-1.05)        |
| Quintile 3                     | 43                                               | 0.88 (0.58-1.33)        | 11                                                | 0.61 (0.26-1.43)        | 54                                      | <b>0.59 (0.43-0.81)</b> |
| Quintile 4                     | 43                                               | 0.79 (0.52-1.20)        | 20                                                | 1.15 (0.56-2.37)        | 93                                      | 0.90 (0.69-1.18)        |

|                 |    |                         |    |                  |    |                  |
|-----------------|----|-------------------------|----|------------------|----|------------------|
| Quintile 5      | 35 | <b>0.61 (0.38-0.97)</b> | 13 | 0.72 (0.31-1.67) | 79 | 0.97 (0.72-1.30) |
| <i>P</i> -trend |    | 0.23                    |    | 0.54             |    | 0.73             |

Abbreviation: aHR: adjusted hazard ratio; CI: confidence interval; CVD: cardiovascular disease

\*Nut/peanut intake quintile cut-points (grams/day):

SMHS/SWHS data (Peanut intake): Q1 (<0.14); Q2 (0.14- less than 0.72); Q3 (0.72-less than 1.45); Q4 (1.45-less than 2.54); Q5 ( $\geq$ 2.54)

SCCS data (Total nut and peanut butter intake): Q1 (<0.95); Q2 (0.95-less than 3.08); Q3 (3.08-less than 7.30); Q4 (7.30-less than 18.45); Q5 ( $\geq$ 18.45)

Model adjusted for:

<sup>a</sup>Age, sex, education, occupation, household income, marital status, smoking pack-years, alcohol consumption, BMI, physical activity, vitamin supplement use, Charlson comorbidity index, metabolic conditions\*\*, total energy intake, red meat intake, chicken intake, seafood intake, vegetable intake, and fruit intake.

<sup>b</sup>Age, sex, education, occupation, household income (SMHS) or income per capita (SWHS), smoking status, alcohol consumption (ever/never), BMI, physical activity, regular tea consumption, Charlson comorbidity index, metabolic conditions\*\*, total energy intake, red meat intake, chicken/duck intake, seafood intake, vegetable intake, and fruit intake.

\*\*One or more of the following conditions: history of hypertension, diabetes, history of heart disease, BMI $\geq$ 30, unspecified dyslipidemia (SMHS and SWHS only), or hypercholesterolemia (SCCS only)
